# Supplementary material for: Assessing the catalytic potential of novel halogen substituted carbene NHC (F, Cl, Br, I) catalysts in [3 + 2] cycloaddition reactions: A computational investigation
Source: Royal Society of Chemistry journal article supplement (doi:10.1039/d4dt02225d), 2024-01-01
Supplement: d4dt02225d1.pdf [file d4dt02225d1.pdf]

## "Assessing the Catalytic Potential of Novel Halogen Substituted Carbenes NHCs (F, Cl, Br, I) Catalysts in [3+2] Cycloaddition Reactions: A Computational Investigation"

Ali A Khairbek<sup>2,1</sup>, Mohammad Abd-Al Hakim Badawi<sup>1</sup>, Abdullah Y. Alzahrani<sup>3</sup>,  
Renjith Thomas<sup>4,5</sup>

<sup>1</sup> Department of Chemistry, Faculty of Science, Tishreen University, Latakia, Syrian Arab Republic.

<sup>2</sup> Centre of Molecular Medicine and Diagnostics (COMManD), Saveetha Dental College and Hospitals, Saveetha Institute of Medical and Technical Sciences, Saveetha University Chennai 600 077, India

<sup>3</sup> Chemistry Department, Faculty of Science, King Abdulaziz University, Jeddah, 23622, Saudi Arabia.

<sup>4</sup> Department of Chemistry, St Berchmans College (Autonomous), Changanassery, Kerala, India-686101.

<sup>5</sup> Centre for Theoretical and Computational Chemistry, St Berchmans College (Autonomous), Changanassery, Kerala, India-686101.

Corresponding Authors:

Ali A Khairbek MRSC: [alikhairbek@gmail.com](mailto:alikhairbek@gmail.com)

Renjith Thomas FRSC: [renjith@sbcollege.ac.in](mailto:renjith@sbcollege.ac.in)

Table S1:  $\Delta G_{298}$  (kcal/mol) in the gas phase and solvents for the mononuclear mechanism.

| Properties                         | NHC-F  |         |        | NHC-Cl |         |        |
|------------------------------------|--------|---------|--------|--------|---------|--------|
|                                    | Gas    | toluene | Water  | Gas    | toluene | Water  |
| $\Delta G(\text{reagents.})$       | 0.00   | 0.00    | 0.00   | 0.00   | 0.00    | 0.00   |
| $\Delta G(\text{RC}_{\text{Mo}})$  | 1.31   | 3.22    | 4.53   | -2.18  | -0.65   | 0.32   |
| $\Delta G(\text{TS1}_{\text{Mo}})$ | 7.68   | 11.21   | 13.94  | 7.67   | 10.73   | 13.05  |
| $\Delta G(\text{IC}_{\text{Mo}})$  | -2.02  | 1.31    | 3.86   | -2.05  | 0.72    | 2.79   |
| $\Delta G(\text{TS2}_{\text{Mo}})$ | 0.50   | 3.41    | 5.60   | 0.68   | 2.99    | 4.66   |
| $\Delta G(\text{P}_{\text{Mo}})$   | -58.37 | -57.68  | -57.38 | -58.96 | -58.06  | -57.60 |
| Properties                         | NHC-Br |         |        | NHC-I  |         |        |
|                                    | Gas    | toluene | Water  | Gas    | toluene | Water  |
| $\Delta G(\text{reagents.})$       | 0.00   | 0.00    | 0.00   | 0.00   | 0.00    | 0.00   |
| $\Delta G(\text{RC}_{\text{Mo}})$  | -3.58  | -1.85   | -0.72  | -0.08  | 2.60    | 4.81   |
| $\Delta G(\text{TS1}_{\text{Mo}})$ | 7.68   | 10.86   | 13.29  | 14.95  | 19.06   | 22.54  |
| $\Delta G(\text{IC}_{\text{Mo}})$  | -1.47  | 1.19    | 3.16   | 6.25   | 9.38    | 12.00  |
| $\Delta G(\text{TS2}_{\text{Mo}})$ | 0.04   | 2.51    | 4.32   | 6.93   | 9.89    | 12.35  |
| $\Delta G(\text{P}_{\text{Mo}})$   | -63.20 | -62.12  | -61.54 | -58.65 | -57.04  | -55.76 |

Table S2:  $\Delta G_{298}$  (kcal/mol) in the gas phase and solvents for the binuclear mechanism.

| Properties                        | NHC-F  |         |       | NHC-Cl |         |        |
|-----------------------------------|--------|---------|-------|--------|---------|--------|
|                                   | Gas    | toluene | Water | Gas    | toluene | Water  |
| $\Delta G(\text{reagents.})$      | 0.00   | 0.00    | 0.00  | 0.00   | 0.00    | 0.00   |
| $\Delta G(\text{RC}_{\text{Bi}})$ | -13.53 | -11.12  | -9.19 | -22.42 | -20.73  | -19.27 |

|                                    |        |         |        |        |         |        |
|------------------------------------|--------|---------|--------|--------|---------|--------|
| $\Delta G(\text{TS1}_{\text{Bi}})$ | 3.81   | 5.95    | 7.39   | -7.82  | -6.07   | -4.77  |
| $\Delta G(\text{IC}_{\text{Bi}})$  | -6.45  | -5.66   | -5.65  | -17.90 | -17.45  | -17.52 |
| $\Delta G(\text{TS2}_{\text{Bi}})$ | 0.35   | 0.50    | 0.04   | -11.98 | -11.75  | -11.96 |
| $\Delta G(\text{P}_{\text{Bi}})$   | -58.81 | -58.88  | -59.39 | -65.77 | -66.14  | -66.70 |
| Properties                         | NHC-Br |         |        | NHC-I  |         |        |
|                                    | Gas    | toluene | Water  | Gas    | toluene | Water  |
| $\Delta G(\text{reagents.})$       | 0.00   | 0.00    | 0.00   | 0.00   | 0.00    | 0.00   |
| $\Delta G(\text{RC}_{\text{Bi}})$  | -10.03 | -8.31   | -7.02  | -0.56  | 1.38    | 2.77   |
| $\Delta G(\text{TS1}_{\text{Bi}})$ | 4.21   | 6.23    | 7.65   | 12.41  | 14.54   | 16.01  |
| $\Delta G(\text{IC}_{\text{Bi}})$  | -6.19  | -5.35   | -5.18  | 3.20   | 4.32    | 4.73   |
| $\Delta G(\text{TS2}_{\text{Bi}})$ | 0.67   | 0.94    | 0.74   | 9.46   | 9.88    | 9.77   |
| $\Delta G(\text{P}_{\text{Bi}})$   | 0.00   | -52.61  | -52.95 | -46.00 | -45.42  | -45.25 |

Table S3. ( $E_o$ ) of catalytic cycle components,  $H_{\text{corr}}$ , and  $G_{\text{corr}}$  in the gas phase (in Hartree) for mononuclear CuAAC reaction path.

| Compound                 |               |                   |                   |
|--------------------------|---------------|-------------------|-------------------|
|                          | NHC-F         |                   |                   |
|                          | $E_o$         | $H_{\text{corr}}$ | $G_{\text{corr}}$ |
| $\text{AC}_{\text{Mo}}$  | -3044.589387  | 0.192604          | 0.114380          |
| $\text{RC}_{\text{Mo}}$  | -3479.007209  | 0.336530          | 0.240637          |
| $\text{TS1}_{\text{Mo}}$ | -3478.999950  | 0.335521          | 0.243531          |
| $\text{IC}_{\text{Mo}}$  | -3479.018533  | 0.337473          | 0.246657          |
| $\text{TS2}_{\text{Mo}}$ | -3479.013939  | 0.336557          | 0.246077          |
| $\text{P}_{\text{Mo}}$   | -3479.110191  | 0.340329          | 0.248522          |
|                          | NHC-Cl        |                   |                   |
|                          | $E_o$         | $H_{\text{corr}}$ | $G_{\text{corr}}$ |
| $\text{AC}_{\text{Mo}}$  | -5926.562779  | 0.179488          | 0.093028          |
| $\text{RC}_{\text{Mo}}$  | -6360.984494  | 0.324343          | 0.217619          |
| $\text{TS1}_{\text{Mo}}$ | -6360.973931  | 0.322437          | 0.222761          |
| $\text{IC}_{\text{Mo}}$  | -6360.992349  | 0.324337          | 0.225687          |
| $\text{TS2}_{\text{Mo}}$ | -6360.987212  | 0.323860          | 0.224894          |
| $\text{P}_{\text{Mo}}$   | -6361.086923  | 0.327593          | 0.229564          |
|                          | NHC-Br        |                   |                   |
|                          | $E_o$         | $H_{\text{corr}}$ | $G_{\text{corr}}$ |
| $\text{AC}_{\text{Mo}}$  | -22828.404587 | 0.176275          | 0.079596          |
| $\text{RC}_{\text{Mo}}$  | -23262.828139 | 0.320956          | 0.203800          |
| $\text{TS1}_{\text{Mo}}$ | -23262.815274 | 0.319070          | 0.208877          |
| $\text{IC}_{\text{Mo}}$  | -23262.832608 | 0.321440          | 0.211625          |
| $\text{TS2}_{\text{Mo}}$ | -23262.830549 | 0.320096          | 0.211974          |
| $\text{P}_{\text{Mo}}$   | -23262.935275 | 0.324254          | 0.215930          |
|                          | NHC-I         |                   |                   |
|                          | $E_o$         | $H_{\text{corr}}$ | $G_{\text{corr}}$ |
| $\text{AC}_{\text{Mo}}$  | -4607.786163  | 0.174215          | 0.069096          |
| $\text{RC}_{\text{Mo}}$  | -5042.204208  | 0.318609          | 0.193369          |
| $\text{TS1}_{\text{Mo}}$ | -5042.185441  | 0.316632          | 0.198551          |
| $\text{IC}_{\text{Mo}}$  | -5042.202164  | 0.319021          | 0.201409          |
| $\text{TS2}_{\text{Mo}}$ | -5042.201492  | 0.318088          | 0.201824          |

|          |              |          |          |
|----------|--------------|----------|----------|
| $P_{Mo}$ | -5042.312979 | 0.321000 | 0.208802 |
| Azide    | -434.3929553 | 0.143198 | 0.09931  |

Table S4. ( $E_o$ ) of catalytic cycle components,  $H_{corr}$ , and  $G_{corr}$  in the gas phase (in Hartree) for binuclear CuAAC reaction path.

| Compound   | NHC-F         |            |            |
|------------|---------------|------------|------------|
|            | $E_o$         | $H_{corr}$ | $G_{corr}$ |
| $AC_{Bi}$  | -5781.735688  | 0.279004   | 0.159896   |
| $RC_{Bi}$  | -6216.181010  | 0.423352   | 0.290015   |
| $TS1_{Bi}$ | -6216.158567  | 0.422149   | 0.295199   |
| $IC_{Bi}$  | -6216.177712  | 0.423815   | 0.297994   |
| $TS2_{Bi}$ | -6216.167296  | 0.422624   | 0.298410   |
| $P_{Bi}$   | -6216.257902  | 0.426359   | 0.294742   |
| Compound   | NHC-Cl        |            |            |
|            | $E_o$         | $H_{corr}$ | $G_{corr}$ |
| $AC_{Bi}$  | -11545.694076 | 0.251959   | 0.124711   |
| $RC_{Bi}$  | -11980.152789 | 0.397640   | 0.254050   |
| $TS1_{Bi}$ | -11980.133372 | 0.396319   | 0.257905   |
| $IC_{Bi}$  | -11980.153463 | 0.398276   | 0.261924   |
| $TS2_{Bi}$ | -11980.144675 | 0.397360   | 0.262578   |
| $P_{Bi}$   | -11980.228579 | 0.400411   | 0.260760   |
| Compound   | NHC-Br        |            |            |
|            | $E_o$         | $H_{corr}$ | $G_{corr}$ |
| $AC_{Bi}$  | -45349.412270 | 0.246176   | 0.099121   |
| $RC_{Bi}$  | -45783.848655 | 0.390886   | 0.225880   |
| $TS1_{Bi}$ | -45783.831590 | 0.389634   | 0.231501   |
| $IC_{Bi}$  | -45783.851893 | 0.391558   | 0.235232   |
| $TS2_{Bi}$ | -45783.839927 | 0.390292   | 0.234194   |
| $P_{Bi}$   | -45783.924498 | 0.393636   | 0.233851   |
| Compound   | NHC-I         |            |            |
|            | $E_o$         | $H_{corr}$ | $G_{corr}$ |
| $AC_{Bi}$  | -8908.180634  | 0.241757   | 0.079671   |
| $RC_{Bi}$  | -9342.600485  | 0.386133   | 0.204979   |
| $TS1_{Bi}$ | -9342.585022  | 0.384675   | 0.210194   |
| $IC_{Bi}$  | -9342.604599  | 0.386603   | 0.215085   |
| $TS2_{Bi}$ | -9342.592701  | 0.385348   | 0.213176   |
| $P_{Bi}$   | -9342.684674  | 0.388806   | 0.216764   |

Table S5. ( $E_o$ ) of catalytic cycle components in toluene and water solvents (in Hartree) for mononuclear CuAAC reaction path.

| Compound  | toluene      |              |               |              |
|-----------|--------------|--------------|---------------|--------------|
|           | NHC-F        | NHC-Cl       | NHC-Br        | NHC-I        |
| $AC_{Mo}$ | -3044.600192 | -5926.571597 | -22828.414287 | -4607.798530 |

|                   |              |              |               |              |
|-------------------|--------------|--------------|---------------|--------------|
| RC <sub>Mo</sub>  | -3479.018193 | -6360.994105 | -23262.838322 | -5042.215538 |
| TS1 <sub>Mo</sub> | -3479.008356 | -6360.981120 | -23262.823136 | -5042.194493 |
| IC <sub>Mo</sub>  | -3479.027268 | -6360.999997 | -23262.841297 | -5042.212769 |
| TS2 <sub>Mo</sub> | -3479.023333 | -6360.995581 | -23262.839550 | -5042.212379 |
| P <sub>Mo</sub>   | -3479.123137 | -6361.097537 | -23262.946496 | -5042.326022 |

Azide -434.3961909

| Compound          | water        |              |               |              |
|-------------------|--------------|--------------|---------------|--------------|
|                   | NHC-F        | NHC-Cl       | NHC-Br        | NHC-I        |
| AC <sub>Mo</sub>  | -3044.609501 | -5926.579164 | -22828.422461 | -4607.809266 |
| RC <sub>Mo</sub>  | -3479.027949 | -6361.002656 | -23262.847232 | -5042.225292 |
| TS1 <sub>Mo</sub> | -3479.015848 | -6360.987513 | -23262.829983 | -5042.202218 |
| IC <sub>Mo</sub>  | -3479.035043 | -6361.006792 | -23262.848875 | -5042.221872 |
| TS2 <sub>Mo</sub> | -3479.031685 | -6361.003010 | -23262.847374 | -5042.221729 |
| P <sub>Mo</sub>   | -3479.134496 | -6361.106906 | -23262.956285 | -5042.337241 |

Azide -434.3987224

Table S6. ( $E_0$ ) of catalytic cycle components in toluene and water solvents (in Hartree) for binuclear CuAAC reaction path.

| Compound          | toluene      |               |               |              |
|-------------------|--------------|---------------|---------------|--------------|
|                   | NHC-F        | NHC-Cl        | NHC-Br        | NHC-I        |
| AC <sub>Bi</sub>  | -5781.771961 | -11545.724278 | -45349.442470 | -8908.212494 |
| RC <sub>Bi</sub>  | -6216.216682 | -11980.183533 | -45783.879351 | -9342.632476 |
| TS1 <sub>Bi</sub> | -6216.194657 | -11980.164027 | -45783.861796 | -9342.616719 |
| IC <sub>Bi</sub>  | -6216.215960 | -11980.186186 | -45783.883986 | -9342.637906 |
| TS2 <sub>Bi</sub> | -6216.206554 | -11980.177757 | -45783.872918 | -9342.627137 |
| P <sub>Bi</sub>   | -6216.297523 | -11980.262612 | -45783.957917 | -9342.718842 |

| Compound          | water        |               |               |              |
|-------------------|--------------|---------------|---------------|--------------|
|                   | NHC-F        | NHC-Cl        | NHC-Br        | NHC-I        |
| AC <sub>Bi</sub>  | -5781.798892 | -11545.746591 | -45349.464378 | -8908.235490 |
| RC <sub>Bi</sub>  | -6216.243075 | -11980.206058 | -45783.901730 | -9342.655792 |
| TS1 <sub>Bi</sub> | -6216.221835 | -11980.186798 | -45783.883987 | -9342.639910 |
| IC <sub>Bi</sub>  | -6216.245406 | -11980.211141 | -45783.908163 | -9342.662783 |
| TS2 <sub>Bi</sub> | -6216.236748 | -11980.202933 | -45783.897691 | -9342.652831 |
| P <sub>Bi</sub>   | -6216.327791 | -11980.288342 | -45783.982898 | -9342.744107 |

Table S7:  $\Delta G_{298}$  in the gas phase and in toluene or water as a solvent for uncatalyzed pathway (in kcal/mol).

| Compound              | 1-4   |         |       | 1-5   |         |       |
|-----------------------|-------|---------|-------|-------|---------|-------|
|                       | Gas   | Toluene | Water | Gas   | Toluene | Water |
| $\Delta G$ (reagents) | 0.0   | 0.0     | 0.0   | 0.0   | 0.0     | 0.0   |
| $\Delta G$ (TS)       | 32.3  | 32.9    | 33.3  | 30.6  | 31.5    | 32.3  |
| $\Delta G$ (P)        | -62.1 | -62.7   | -63.5 | -59.8 | -60.2   | -60.6 |

Table S8. ( $E_o$ ) in the in toluene and water as a solvent for uncatalyzed cycle components,  $H_{\text{corr}}$ , and  $G_{\text{corr}}$  in the gas phase (in Hartree).

| Compound | MN12L           |               |             |                   |                   |
|----------|-----------------|---------------|-------------|-------------------|-------------------|
|          | $E_o$ gas phase | $E_o$ toluene | $E_o$ water | $H_{\text{corr}}$ | $G_{\text{corr}}$ |
| Azide    | -434.392955     | -434.396191   | -434.398722 | 0.143198          | 0.099310          |
| alkyne   | -307.868657     | -307.871284   | -307.873359 | 0.117950          | 0.080250          |
| 1,4-TS   | -742.231141     | -742.236017   | -742.240038 | 0.261346          | 0.200499          |
| 1,5-TS   | -742.234612     | -742.238895   | -742.242335 | 0.261262          | 0.201247          |
| 1,4-P    | -742.389283     | -742.396116   | -742.401878 | 0.267302          | 0.208233          |
| 1,5-P    | -742.387732     | -742.394211   | -742.399565 | 0.267447          | 0.210414          |

Table S9. ( $E_o$ ) of catalytic cycle components in solvents (in Hartree) for mononuclear CuAAC reaction path.

|                 | $E_o$            |                  |                   |
|-----------------|------------------|------------------|-------------------|
|                 | NHC-F            |                  |                   |
|                 | $AC_{\text{MO}}$ | $RC_{\text{MO}}$ | $TS1_{\text{MO}}$ |
| methanol        | -3044.609057     | -3479.015483     | -3479.015483      |
| acetonitrile    | -3044.609123     | -3479.027544     | -3479.015537      |
| cyclohexane     | -3044.598655     | -3479.016617     | -3479.007147      |
| benzene         | -3044.599793     | -3479.017783     | -3479.008041      |
| dichloromethane | -3044.607087     | -3479.025378     | -3479.013872      |
|                 | NHC-Cl           |                  |                   |
|                 | $AC_{\text{MO}}$ | $RC_{\text{MO}}$ | $TS1_{\text{MO}}$ |
| methanol        | -5926.578803     | -6360.987200     | -6360.987200      |
| acetonitrile    | -5926.578856     | -6361.002299     | -6360.987246      |
| cyclohexane     | -5926.570349     | -6360.992727     | -6360.980089      |
| benzene         | -5926.571273     | -6360.993746     | -6360.980851      |
| dichloromethane | -5926.577198     | -6361.000394     | -6360.985823      |
|                 | NHC-Br           |                  |                   |
|                 | $AC_{\text{MO}}$ | $RC_{\text{MO}}$ | $TS1_{\text{MO}}$ |
| methanol        | -22828.422072    | -23262.829651    | -23262.829651     |
| acetonitrile    | -22828.422129    | -23262.846861    | -23262.829700     |
| cyclohexane     | -22828.412928    | -23262.836875    | -23262.822022     |
| benzene         | -22828.413934    | -23262.837945    | -23262.822847     |
| dichloromethane | -22828.420344    | -23262.844884    | -23262.828183     |
|                 | NHC-I            |                  |                   |
|                 | $AC_{\text{MO}}$ | $RC_{\text{MO}}$ | $TS1_{\text{MO}}$ |
| methanol        | -4607.808745     | -5042.201845     | -5042.201845      |
| acetonitrile    | -4607.808822     | -5042.224888     | -5042.201900      |
| cyclohexane     | -4607.796778     | -5042.213942     | -5042.193223      |
| benzene         | -4607.798074     | -5042.215123     | -5042.194163      |
| dichloromethane | -4607.806447     | -5042.222732     | -5042.200197      |

Table S10. ( $E_o$ ) of catalytic cycle components in solvents (in Hartree) for binuclear CuAAC reaction path.

|  | $E_o$ |  |  |
|--|-------|--|--|
|  | NHC-F |  |  |

|                 | <b>AC<sub>MO</sub></b> | <b>RC<sub>MO</sub></b> | <b>TS1<sub>MO</sub></b> |
|-----------------|------------------------|------------------------|-------------------------|
| methanol        | -5781.797681           | -6216.220603           | -6216.220603            |
| acetonitrile    | -5781.797860           | -6216.242066           | -6216.220785            |
| cyclohexane     | -5781.767172           | -6216.211977           | -6216.189864            |
| benzene         | -5781.770727           | -6216.215469           | -6216.193421            |
| dichloromethane | -5781.792219           | -6216.236548           | -6216.215061            |
| <b>NHC-CI</b>   |                        |                        |                         |
|                 | <b>AC<sub>BI</sub></b> | <b>RC<sub>BI</sub></b> | <b>TS1<sub>BI</sub></b> |
| methanol        | -11545.745589          | -11980.185773          | -11980.185773           |
| acetonitrile    | -11545.745736          | -11980.205201          | -11980.185924           |
| cyclohexane     | -11545.720303          | -11980.179497          | -11980.159981           |
| benzene         | -11545.723254          | -11980.182494          | -11980.162984           |
| dichloromethane | -11545.741066          | -11980.200508          | -11980.181151           |
| <b>NHC-Br</b>   |                        |                        |                         |
|                 | <b>AC<sub>BI</sub></b> | <b>RC<sub>BI</sub></b> | <b>TS1<sub>BI</sub></b> |
| methanol        | -45349.463404          | -45783.882993          | -45783.882993           |
| acetonitrile    | -45349.463548          | -45783.900880          | -45783.883140           |
| cyclohexane     | -45349.438524          | -45783.875331          | -45783.857828           |
| benzene         | -45349.441454          | -45783.878316          | -45783.860774           |
| dichloromethane | -45349.458998          | -45783.896226          | -45783.878508           |
| <b>NHC-I</b>    |                        |                        |                         |
|                 | <b>AC<sub>BI</sub></b> | <b>RC<sub>BI</sub></b> | <b>TS1<sub>BI</sub></b> |
| methanol        | -8908.234471           | -9342.638874           | -9342.638874            |
| acetonitrile    | -8908.234621           | -9342.654907           | -9342.639027            |
| cyclohexane     | -8908.208339           | -9342.628286           | -9342.612562            |
| benzene         | -8908.211425           | -9342.631397           | -9342.615649            |
| dichloromethane | -8908.229856           | -9342.650058           | -9342.634195            |

Table S11. ( $E_o$ ) of Azide in solvents (in Hartree) for mononuclear CuAAC reaction path.

| <b>E<sub>o</sub></b> |             |
|----------------------|-------------|
| <b>Azide</b>         |             |
| methanol             | -434.398606 |
| acetonitrile         | -434.398623 |
| cyclohexane          | -434.395752 |
| benzene              | -434.396077 |
| dichloromethane      | -434.398085 |

### MN12L Optimized Cartesian Coordinates for mononuclear catalytic cycle components

Azide

|   |              |              |              |
|---|--------------|--------------|--------------|
| 7 | -2.679814000 | -1.130672000 | 1.175397000  |
| 7 | -2.272638000 | 0.338471000  | -0.613110000 |
| 7 | -2.427365000 | -0.396209000 | 0.354994000  |
| 6 | 0.191276000  | 0.566889000  | -0.293159000 |
| 6 | 1.177301000  | 1.229108000  | 0.440646000  |
| 6 | 0.455186000  | -0.717625000 | -0.777489000 |
| 6 | 2.409428000  | 0.627434000  | 0.676936000  |

|   |              |              |              |
|---|--------------|--------------|--------------|
| 1 | 0.972529000  | 2.229930000  | 0.835808000  |
| 6 | 1.684245000  | -1.322020000 | -0.535867000 |
| 1 | -0.314370000 | -1.245148000 | -1.350771000 |
| 6 | 2.665367000  | -0.650902000 | 0.189489000  |
| 1 | 3.171351000  | 1.156949000  | 1.255347000  |
| 1 | 1.878183000  | -2.327967000 | -0.917956000 |
| 1 | 3.629829000  | -1.128681000 | 0.380834000  |
| 6 | -1.127626000 | 1.242734000  | -0.571945000 |
| 1 | -1.114778000 | 1.728347000  | -1.560052000 |
| 1 | -1.295078000 | 2.051739000  | 0.164155000  |

AC<sub>Mo</sub>\_NHC-F

|    |              |              |              |
|----|--------------|--------------|--------------|
| 6  | -2.172778000 | -0.000064000 | -0.000053000 |
| 6  | -3.404803000 | -0.000112000 | -0.000078000 |
| 29 | -0.335679000 | 0.000029000  | 0.000004000  |
| 6  | -4.823184000 | -0.000032000 | -0.000045000 |
| 6  | -5.547411000 | -1.208514000 | -0.000214000 |
| 6  | -5.547301000 | 1.208509000  | 0.000168000  |
| 6  | -6.935363000 | -1.203918000 | -0.000222000 |
| 6  | -6.935255000 | 1.204032000  | 0.000234000  |
| 6  | -7.637254000 | 0.000090000  | 0.000020000  |
| 1  | -4.993666000 | -2.150989000 | -0.000394000 |
| 1  | -4.993481000 | 2.150940000  | 0.000320000  |
| 1  | -7.479005000 | -2.153050000 | -0.000415000 |
| 1  | -7.478814000 | 2.153212000  | 0.000451000  |
| 1  | -8.730534000 | 0.000141000  | 0.000046000  |
| 9  | 2.549437000  | 3.035136000  | 1.064455000  |
| 6  | 2.038923000  | 2.458269000  | -0.000002000 |
| 9  | 2.549379000  | 3.035119000  | -1.064490000 |
| 9  | 0.746653000  | 2.589831000  | 0.000026000  |
| 7  | 2.398310000  | 1.063483000  | -0.000012000 |
| 6  | 1.535673000  | 0.000012000  | -0.000020000 |
| 7  | 2.398270000  | -1.063495000 | -0.000024000 |
| 6  | 2.038833000  | -2.458266000 | 0.000091000  |
| 9  | 0.746558000  | -2.589778000 | 0.000146000  |
| 9  | 2.549261000  | -3.035217000 | -1.064363000 |
| 9  | 2.549335000  | -3.035063000 | 1.064585000  |
| 9  | 4.679843000  | -1.544023000 | -0.000084000 |
| 6  | 3.726685000  | -0.670503000 | -0.000078000 |
| 6  | 3.726710000  | 0.670438000  | -0.000067000 |
| 9  | 4.679899000  | 1.543923000  | -0.000085000 |

TS1<sub>Mo</sub>\_NHC-F

|   |              |              |              |
|---|--------------|--------------|--------------|
| 7 | -0.884160000 | 0.799083000  | 1.415069000  |
| 7 | -2.054871000 | 0.937765000  | 1.919610000  |
| 7 | -3.171025000 | 0.741170000  | 1.607468000  |
| 6 | -2.410138000 | -0.145420000 | -0.669680000 |
| 6 | -3.571584000 | 0.002754000  | -0.190472000 |

|    |              |              |              |
|----|--------------|--------------|--------------|
| 29 | -0.608505000 | 0.071412000  | -0.416135000 |
| 6  | 0.223605000  | 1.240958000  | 2.241569000  |
| 1  | 0.637922000  | 2.195939000  | 1.860306000  |
| 1  | -0.132898000 | 1.454350000  | 3.264971000  |
| 6  | 1.321910000  | 0.209491000  | 2.276873000  |
| 6  | 2.663402000  | 0.592013000  | 2.206096000  |
| 6  | 1.012040000  | -1.152056000 | 2.363206000  |
| 6  | 3.678820000  | -0.363457000 | 2.218491000  |
| 6  | 2.023374000  | -2.105215000 | 2.373238000  |
| 6  | 3.360705000  | -1.716602000 | 2.291761000  |
| 1  | 2.913565000  | 1.657191000  | 2.130981000  |
| 1  | -0.038700000 | -1.459174000 | 2.395014000  |
| 1  | 4.724919000  | -0.047442000 | 2.159047000  |
| 1  | 1.767124000  | -3.167358000 | 2.429162000  |
| 1  | 4.153208000  | -2.470007000 | 2.288674000  |
| 6  | -5.002309000 | -0.120833000 | -0.244041000 |
| 6  | -5.868424000 | 0.686459000  | 0.509276000  |
| 6  | -5.558902000 | -1.082053000 | -1.108379000 |
| 6  | -7.245168000 | 0.533029000  | 0.397091000  |
| 6  | -6.934638000 | -1.227694000 | -1.213524000 |
| 6  | -7.785885000 | -0.421549000 | -0.460085000 |
| 1  | -5.448975000 | 1.437758000  | 1.180034000  |
| 1  | -4.884516000 | -1.713673000 | -1.693131000 |
| 1  | -7.906905000 | 1.172245000  | 0.988404000  |
| 1  | -7.348222000 | -1.981198000 | -1.889680000 |
| 1  | -8.869942000 | -0.537380000 | -0.542211000 |
| 9  | 1.562095000  | -2.619639000 | -2.273363000 |
| 6  | 1.692062000  | -2.321529000 | -0.997259000 |
| 9  | 2.591227000  | -3.125000000 | -0.479864000 |
| 9  | 0.545190000  | -2.497433000 | -0.401383000 |
| 7  | 2.120983000  | -0.957254000 | -0.849226000 |
| 6  | 1.239227000  | 0.093778000  | -0.808930000 |
| 7  | 2.067178000  | 1.173750000  | -0.960130000 |
| 6  | 1.675312000  | 2.549154000  | -0.919608000 |
| 9  | 0.387747000  | 2.648116000  | -0.754345000 |
| 9  | 2.293127000  | 3.154482000  | 0.078353000  |
| 9  | 2.031976000  | 3.148015000  | -2.033407000 |
| 9  | 4.328000000  | 1.696714000  | -1.202986000 |
| 6  | 3.395800000  | 0.802909000  | -1.094446000 |
| 6  | 3.431783000  | -0.534366000 | -1.032021000 |
| 9  | 4.425903000  | -1.359971000 | -1.073911000 |

TS1'<sub>Mo</sub>\_NHC-F

|    |              |              |              |
|----|--------------|--------------|--------------|
| 7  | 0.303158000  | -0.962249000 | -1.035056000 |
| 7  | -0.803973000 | -1.232380000 | -1.355492000 |
| 7  | -1.960467000 | -1.272840000 | -0.872165000 |
| 6  | -0.907623000 | -0.097839000 | 1.280910000  |
| 6  | -2.071856000 | -0.479202000 | 0.943331000  |
| 29 | 0.821345000  | -0.093092000 | 0.719436000  |



|   |              |              |              |
|---|--------------|--------------|--------------|
| 6 | -3.476676000 | -0.592682000 | 1.252073000  |
| 6 | -4.158580000 | -1.813057000 | 1.131762000  |
| 6 | -4.194144000 | 0.544550000  | 1.658014000  |
| 6 | -5.522100000 | -1.888617000 | 1.389964000  |
| 6 | -5.555997000 | 0.462419000  | 1.915312000  |
| 6 | -6.228172000 | -0.750621000 | 1.775350000  |
| 1 | -3.594916000 | -2.700916000 | 0.827317000  |
| 1 | -3.661967000 | 1.496670000  | 1.742890000  |
| 1 | -6.039800000 | -2.847599000 | 1.294647000  |
| 1 | -6.103288000 | 1.359426000  | 2.219131000  |
| 1 | -7.301769000 | -0.810942000 | 1.973540000  |
| 9 | 3.914859000  | 2.977661000  | 1.478622000  |
| 6 | 3.105349000  | 2.508674000  | 0.554692000  |
| 9 | 3.232912000  | 3.258041000  | -0.518239000 |
| 9 | 1.877852000  | 2.549353000  | 0.980194000  |
| 7 | 3.476038000  | 1.157271000  | 0.235560000  |
| 6 | 2.691698000  | 0.049590000  | 0.389141000  |
| 7 | 3.518143000  | -0.952565000 | -0.035732000 |
| 6 | 3.162690000  | -2.348494000 | -0.106321000 |
| 9 | 2.104090000  | -2.576390000 | 0.613540000  |
| 9 | 2.953144000  | -2.704916000 | -1.348497000 |
| 9 | 4.169890000  | -3.056628000 | 0.362959000  |
| 9 | 5.663985000  | -1.264816000 | -0.923468000 |
| 6 | 4.751519000  | -0.476241000 | -0.456733000 |
| 6 | 4.726055000  | 0.852473000  | -0.279184000 |
| 9 | 5.604580000  | 1.778896000  | -0.492523000 |
| 6 | -3.108002000 | -1.222618000 | -1.771399000 |
| 1 | -2.755455000 | -1.395404000 | -2.801568000 |
| 6 | -3.846271000 | 0.088305000  | -1.670086000 |
| 6 | -3.145936000 | 1.292171000  | -1.555136000 |
| 6 | -5.240511000 | 0.105486000  | -1.648310000 |
| 6 | -3.834836000 | 2.492055000  | -1.419173000 |
| 6 | -5.930600000 | 1.306822000  | -1.518734000 |
| 6 | -5.228571000 | 2.502657000  | -1.399136000 |
| 1 | -2.050216000 | 1.280373000  | -1.530562000 |
| 1 | -5.789814000 | -0.841697000 | -1.699912000 |
| 1 | -3.279123000 | 3.428516000  | -1.318222000 |
| 1 | -7.023806000 | 1.306199000  | -1.489609000 |
| 1 | -5.767923000 | 3.446767000  | -1.283206000 |
| 1 | -3.797643000 | -2.048166000 | -1.529231000 |

AC<sub>Bi</sub>\_NHC-F

|    |              |             |              |
|----|--------------|-------------|--------------|
| 6  | 0.001884000  | 2.054818000 | 0.000754000  |
| 6  | 0.003909000  | 3.297298000 | 0.000969000  |
| 29 | -1.255529000 | 0.639704000 | 0.000337000  |
| 6  | 0.006140000  | 4.710076000 | 0.000867000  |
| 6  | 0.007279000  | 5.421777000 | 1.217295000  |
| 6  | 0.007296000  | 5.421601000 | -1.215665000 |
| 6  | 0.009548000  | 6.807813000 | 1.210524000  |

|    |              |              |              |
|----|--------------|--------------|--------------|
| 6  | 0.009565000  | 6.807638000  | -1.209099000 |
| 6  | 0.010695000  | 7.501142000  | 0.000662000  |
| 1  | 0.006367000  | 4.866632000  | 2.158679000  |
| 1  | 0.006397000  | 4.866318000  | -2.156968000 |
| 1  | 0.010431000  | 7.356401000  | 2.155644000  |
| 1  | 0.010462000  | 7.356087000  | -2.154299000 |
| 1  | 0.012486000  | 8.594421000  | 0.000582000  |
| 6  | -2.968535000 | -1.003859000 | -2.459357000 |
| 7  | -3.243388000 | -1.258316000 | -1.061792000 |
| 6  | -2.617764000 | -0.680192000 | -0.000195000 |
| 7  | -3.243763000 | -1.258797000 | 1.060920000  |
| 6  | -2.969303000 | -1.005070000 | 2.458696000  |
| 6  | -4.218229000 | -2.162437000 | 0.671299000  |
| 6  | -4.217999000 | -2.162123000 | -0.672926000 |
| 29 | 1.255960000  | 0.636687000  | 0.000351000  |
| 6  | 2.615457000  | -0.686016000 | 0.000095000  |
| 7  | 3.240005000  | -1.265953000 | 1.061339000  |
| 6  | 2.965690000  | -1.011825000 | 2.459062000  |
| 6  | 4.213133000  | -2.171124000 | 0.671921000  |
| 6  | 4.213417000  | -2.170560000 | -0.672302000 |
| 7  | 3.240463000  | -1.265052000 | -1.061370000 |
| 6  | 2.966639000  | -1.009841000 | -2.458995000 |
| 9  | 2.578683000  | -2.121747000 | -3.030185000 |
| 9  | 2.027536000  | -0.108369000 | -2.558697000 |
| 9  | 4.057529000  | -0.588365000 | -3.040866000 |
| 9  | 2.026335000  | -0.110656000 | 2.559142000  |
| 9  | 4.056296000  | -0.590510000 | 3.041587000  |
| 9  | 2.577830000  | -2.124247000 | 3.029305000  |
| 9  | 4.903320000  | -2.817074000 | 1.546471000  |
| 9  | 4.903958000  | -2.815795000 | -1.547099000 |
| 9  | -2.029088000 | -0.104814000 | 2.558912000  |
| 9  | -2.582533000 | -2.117904000 | 3.028883000  |
| 9  | -4.059543000 | -0.582761000 | 3.041177000  |
| 9  | -4.909756000 | -2.807168000 | 1.545689000  |
| 9  | -4.909249000 | -2.806412000 | -1.547859000 |
| 9  | -2.581900000 | -2.116463000 | -3.030085000 |
| 9  | -4.058534000 | -0.580953000 | -3.041858000 |
| 9  | -2.028081000 | -0.103770000 | -2.558840000 |

TS1<sub>Bi</sub>\_NHC-F

|    |              |             |              |
|----|--------------|-------------|--------------|
| 29 | -0.583795000 | 1.327010000 | -0.173961000 |
| 6  | 1.910587000  | 2.915635000 | -0.231475000 |
| 6  | 1.201477000  | 1.860901000 | -0.237645000 |
| 7  | 0.665928000  | 4.373951000 | -0.002899000 |
| 7  | -1.267482000 | 3.137030000 | 0.058140000  |
| 7  | -0.472696000 | 4.125692000 | 0.068111000  |
| 6  | -3.338721000 | 2.435353000 | 1.139168000  |
| 6  | -2.713424000 | 2.120820000 | 2.349633000  |
| 6  | -4.559529000 | 1.829135000 | 0.830324000  |

|    |              |              |              |
|----|--------------|--------------|--------------|
| 6  | -3.292175000 | 1.208254000  | 3.225016000  |
| 1  | -1.754822000 | 2.588798000  | 2.598930000  |
| 6  | -5.139105000 | 0.913046000  | 1.706416000  |
| 1  | -5.065871000 | 2.084277000  | -0.107349000 |
| 6  | -4.501137000 | 0.592400000  | 2.902540000  |
| 1  | -2.794323000 | 0.971819000  | 4.170053000  |
| 1  | -6.099857000 | 0.453286000  | 1.455947000  |
| 1  | -4.954297000 | -0.124046000 | 3.593234000  |
| 6  | -2.699013000 | 3.400736000  | 0.175490000  |
| 1  | -2.852404000 | 4.443039000  | 0.502338000  |
| 1  | -3.182119000 | 3.310445000  | -0.816283000 |
| 6  | 3.200003000  | 3.541273000  | -0.352938000 |
| 6  | 4.227903000  | 2.778129000  | -0.941250000 |
| 6  | 3.489746000  | 4.836113000  | 0.099803000  |
| 6  | 5.506005000  | 3.297855000  | -1.069638000 |
| 1  | 3.992980000  | 1.773772000  | -1.308897000 |
| 6  | 4.775570000  | 5.346015000  | -0.030582000 |
| 1  | 2.705173000  | 5.438241000  | 0.559033000  |
| 6  | 5.784855000  | 4.585536000  | -0.613866000 |
| 1  | 6.291999000  | 2.697874000  | -1.535496000 |
| 1  | 4.991533000  | 6.355217000  | 0.329105000  |
| 1  | 6.792072000  | 4.997200000  | -0.716996000 |
| 6  | -2.019513000 | 0.060729000  | -0.240164000 |
| 7  | -2.344296000 | -0.894578000 | 0.676017000  |
| 7  | -2.941968000 | -0.127225000 | -1.217819000 |
| 6  | -3.432121000 | -1.657994000 | 0.266042000  |
| 6  | -3.815697000 | -1.161658000 | -0.921089000 |
| 9  | -3.907024000 | -2.612163000 | 0.990481000  |
| 9  | -4.787356000 | -1.457043000 | -1.716291000 |
| 6  | -1.485271000 | -1.263485000 | 1.768627000  |
| 9  | -2.194977000 | -1.689581000 | 2.774551000  |
| 9  | -0.678198000 | -2.243664000 | 1.382789000  |
| 9  | -0.747492000 | -0.248601000 | 2.128954000  |
| 6  | -3.077181000 | 0.671908000  | -2.409359000 |
| 9  | -4.219059000 | 1.318492000  | -2.381647000 |
| 9  | -2.092945000 | 1.528388000  | -2.471882000 |
| 9  | -3.061263000 | -0.109306000 | -3.457750000 |
| 29 | 1.429354000  | -0.035330000 | -0.240073000 |
| 6  | 2.017996000  | -1.849293000 | -0.170718000 |
| 7  | 1.450957000  | -3.006346000 | -0.613293000 |
| 7  | 3.181701000  | -2.285898000 | 0.382861000  |
| 6  | 4.186544000  | -1.457674000 | 1.020169000  |
| 9  | 3.836004000  | -0.202841000 | 0.919537000  |
| 9  | 5.334331000  | -1.650638000 | 0.427062000  |
| 9  | 4.288615000  | -1.794403000 | 2.278135000  |
| 6  | 3.332601000  | -3.658708000 | 0.288617000  |
| 9  | 4.372813000  | -4.246175000 | 0.767767000  |
| 6  | 2.239002000  | -4.115306000 | -0.344952000 |
| 9  | 1.865649000  | -5.294613000 | -0.703783000 |
| 6  | 0.207774000  | -3.139034000 | -1.333304000 |

|   |              |              |              |
|---|--------------|--------------|--------------|
| 9 | 0.445156000  | -3.575730000 | -2.541759000 |
| 9 | -0.565083000 | -3.996345000 | -0.715610000 |
| 9 | -0.393540000 | -1.975900000 | -1.394291000 |

TS1'Bi\_NHC-F

|    |              |              |              |
|----|--------------|--------------|--------------|
| 29 | -0.113664000 | -1.460019000 | 0.779298000  |
| 6  | -2.661033000 | 0.054652000  | 0.698148000  |
| 6  | -1.414097000 | -0.140296000 | 0.518678000  |
| 7  | -3.456835000 | -1.569448000 | 1.492923000  |
| 7  | -1.456517000 | -2.691236000 | 1.548927000  |
| 7  | -2.598435000 | -2.454016000 | 1.620061000  |
| 6  | -3.812726000 | 0.915640000  | 0.571764000  |
| 6  | -4.628911000 | 1.212868000  | 1.672208000  |
| 6  | -4.121001000 | 1.461189000  | -0.684442000 |
| 6  | -5.738918000 | 2.033310000  | 1.514125000  |
| 1  | -4.376658000 | 0.793041000  | 2.651317000  |
| 6  | -5.233185000 | 2.278161000  | -0.833473000 |
| 1  | -3.491646000 | 1.206184000  | -1.542709000 |
| 6  | -6.047078000 | 2.561789000  | 0.261859000  |
| 1  | -6.368146000 | 2.267318000  | 2.377038000  |
| 1  | -5.475278000 | 2.689171000  | -1.817248000 |
| 1  | -6.924930000 | 3.201752000  | 0.140287000  |
| 6  | 1.676398000  | -2.169428000 | 0.663086000  |
| 7  | 2.798542000  | -1.662808000 | 1.248908000  |
| 7  | 2.180320000  | -3.059369000 | -0.227330000 |
| 6  | 3.960276000  | -2.184930000 | 0.695152000  |
| 6  | 3.564988000  | -3.076390000 | -0.230114000 |
| 9  | 5.129962000  | -1.806368000 | 1.080392000  |
| 9  | 4.217984000  | -3.863243000 | -1.014672000 |
| 6  | 2.776764000  | -0.579451000 | 2.195838000  |
| 9  | 3.734510000  | -0.737649000 | 3.065319000  |
| 9  | 2.964876000  | 0.567822000  | 1.563004000  |
| 9  | 1.620492000  | -0.540883000 | 2.796619000  |
| 6  | 1.404376000  | -3.890150000 | -1.122741000 |
| 9  | 1.682189000  | -5.146195000 | -0.896034000 |
| 9  | 0.135233000  | -3.665543000 | -0.925703000 |
| 9  | 1.724154000  | -3.599098000 | -2.359599000 |
| 29 | 0.060157000  | 0.927257000  | -0.012544000 |
| 6  | 1.431562000  | 2.162473000  | -0.480996000 |
| 7  | 2.666523000  | 1.975631000  | -1.031456000 |
| 7  | 1.408136000  | 3.507372000  | -0.274102000 |
| 6  | 0.316082000  | 4.265307000  | 0.304947000  |
| 9  | -0.687667000 | 3.466100000  | 0.540932000  |
| 9  | -0.042180000 | 5.200917000  | -0.534112000 |
| 9  | 0.720553000  | 4.818561000  | 1.418183000  |
| 6  | 2.580647000  | 4.129166000  | -0.670491000 |
| 9  | 2.734665000  | 5.400342000  | -0.537787000 |
| 6  | 3.377454000  | 3.160562000  | -1.150801000 |
| 9  | 4.566005000  | 3.167886000  | -1.648813000 |

|   |              |              |              |
|---|--------------|--------------|--------------|
| 6 | 3.231713000  | 0.729363000  | -1.473767000 |
| 9 | 3.532188000  | 0.807585000  | -2.742213000 |
| 9 | 4.327820000  | 0.467600000  | -0.797044000 |
| 9 | 2.371228000  | -0.239776000 | -1.279746000 |
| 6 | -4.868491000 | -1.911538000 | 1.295819000  |
| 1 | -4.998826000 | -2.974962000 | 1.553935000  |
| 1 | -5.472292000 | -1.332343000 | 2.011391000  |
| 6 | -5.316740000 | -1.620941000 | -0.112143000 |
| 6 | -4.498221000 | -1.937643000 | -1.199470000 |
| 6 | -6.546337000 | -1.002921000 | -0.335975000 |
| 6 | -4.905316000 | -1.631992000 | -2.493274000 |
| 6 | -6.957412000 | -0.704857000 | -1.631506000 |
| 6 | -6.134636000 | -1.012409000 | -2.711395000 |
| 1 | -3.522786000 | -2.409448000 | -1.030761000 |
| 1 | -7.178681000 | -0.733538000 | 0.517618000  |
| 1 | -4.260711000 | -1.881573000 | -3.340392000 |
| 1 | -7.921869000 | -0.217427000 | -1.797471000 |
| 1 | -6.453680000 | -0.772682000 | -3.729134000 |

#### AC<sub>Mo</sub>\_NHC-Cl

|    |              |              |              |
|----|--------------|--------------|--------------|
| 6  | -2.853851000 | 0.000038000  | -0.000056000 |
| 6  | -4.086416000 | -0.000002000 | 0.000111000  |
| 29 | -1.002741000 | 0.000172000  | -0.000111000 |
| 6  | -5.505420000 | -0.000068000 | 0.000087000  |
| 6  | -6.230289000 | -0.613769000 | -1.040468000 |
| 6  | -6.230483000 | 0.613506000  | 1.040575000  |
| 6  | -7.618418000 | -0.610174000 | -1.037304000 |
| 6  | -7.618607000 | 0.609684000  | 1.037277000  |
| 6  | -8.321334000 | -0.000303000 | -0.000047000 |
| 1  | -5.677321000 | -1.092572000 | -1.852854000 |
| 1  | -5.677672000 | 1.092399000  | 1.853015000  |
| 1  | -8.161285000 | -1.091375000 | -1.856038000 |
| 1  | -8.161637000 | 1.090793000  | 1.855956000  |
| 1  | -9.414568000 | -0.000390000 | -0.000088000 |
| 17 | 2.010660000  | 3.292422000  | 1.387661000  |
| 6  | 1.345008000  | 2.477319000  | -0.057353000 |
| 17 | 2.011532000  | 3.223500000  | -1.538404000 |
| 17 | -0.396108000 | 2.690994000  | -0.063073000 |
| 7  | 1.734221000  | 1.078503000  | -0.024121000 |
| 6  | 0.884743000  | 0.000029000  | -0.000136000 |
| 7  | 1.734213000  | -1.078479000 | 0.024028000  |
| 6  | 1.344883000  | -2.477223000 | 0.056832000  |
| 17 | -0.396164000 | -2.690672000 | 0.063250000  |
| 17 | 2.011147000  | -3.292304000 | -1.387558000 |
| 17 | 2.011999000  | -3.224041000 | 1.538427000  |
| 17 | 4.443711000  | -1.661245000 | 0.037179000  |
| 6  | 3.070625000  | -0.674921000 | 0.015139000  |
| 6  | 3.070604000  | 0.674943000  | -0.015121000 |
| 17 | 4.443615000  | 1.661443000  | -0.037090000 |

TS1<sub>Mo</sub>\_NHC-Cl

|    |              |              |              |
|----|--------------|--------------|--------------|
| 7  | -1.448768000 | 0.604009000  | 1.674755000  |
| 7  | -2.640813000 | 0.703067000  | 2.130971000  |
| 7  | -3.740285000 | 0.542069000  | 1.744240000  |
| 6  | -2.859305000 | -0.046944000 | -0.591152000 |
| 6  | -4.041012000 | 0.038449000  | -0.145899000 |
| 29 | -1.057088000 | 0.079906000  | -0.202397000 |
| 6  | -0.380811000 | 1.048961000  | 2.548831000  |
| 1  | 0.040004000  | 2.004050000  | 2.172018000  |
| 1  | -0.781862000 | 1.265419000  | 3.554931000  |
| 6  | 0.723712000  | 0.028084000  | 2.626171000  |
| 6  | 2.063560000  | 0.420748000  | 2.613670000  |
| 6  | 0.419459000  | -1.335388000 | 2.689848000  |
| 6  | 3.084444000  | -0.526955000 | 2.655802000  |
| 6  | 1.435697000  | -2.280557000 | 2.738721000  |
| 6  | 2.772505000  | -1.881281000 | 2.711946000  |
| 1  | 2.309817000  | 1.486716000  | 2.548814000  |
| 1  | -0.629758000 | -1.648685000 | 2.678676000  |
| 1  | 4.129793000  | -0.203164000 | 2.620788000  |
| 1  | 1.185625000  | -3.344852000 | 2.778628000  |
| 1  | 3.570117000  | -2.629923000 | 2.726787000  |
| 6  | -5.467895000 | -0.071775000 | -0.286273000 |
| 6  | -6.372114000 | 0.644751000  | 0.512692000  |
| 6  | -5.979872000 | -0.922059000 | -1.284039000 |
| 6  | -7.741422000 | 0.511465000  | 0.315581000  |
| 6  | -7.348586000 | -1.048791000 | -1.473325000 |
| 6  | -8.237693000 | -0.333643000 | -0.673147000 |
| 1  | -5.988240000 | 1.310080000  | 1.287338000  |
| 1  | -5.276634000 | -1.483254000 | -1.905566000 |
| 1  | -8.432502000 | 1.079337000  | 0.944956000  |
| 1  | -7.726795000 | -1.716117000 | -2.252879000 |
| 1  | -9.316145000 | -0.435089000 | -0.821406000 |
| 17 | 1.423062000  | -2.416508000 | -2.674427000 |
| 6  | 1.242804000  | -2.314504000 | -0.888518000 |
| 17 | 2.199102000  | -3.629361000 | -0.162837000 |
| 17 | -0.436761000 | -2.598164000 | -0.438346000 |
| 7  | 1.688088000  | -0.993670000 | -0.482018000 |
| 6  | 0.825405000  | 0.089566000  | -0.471218000 |
| 7  | 1.662900000  | 1.181021000  | -0.505382000 |
| 6  | 1.259760000  | 2.557229000  | -0.667160000 |
| 17 | -0.483795000 | 2.754880000  | -0.653486000 |
| 17 | 1.941018000  | 3.562944000  | 0.657154000  |
| 17 | 1.894535000  | 3.163099000  | -2.229702000 |
| 17 | 4.365126000  | 1.784334000  | -0.519717000 |
| 6  | 3.001194000  | 0.783304000  | -0.567865000 |
| 6  | 3.014445000  | -0.563977000 | -0.578289000 |
| 17 | 4.417633000  | -1.505775000 | -0.632744000 |

TS1<sub>Mo</sub>\_NHC-Cl

|    |              |              |              |
|----|--------------|--------------|--------------|
| 7  | -0.650604000 | -0.041930000 | -1.458536000 |
| 7  | -1.805124000 | -0.126291000 | -1.693854000 |
| 7  | -2.900888000 | -0.198016000 | -1.079883000 |
| 6  | -1.417955000 | -0.462351000 | 1.106101000  |
| 6  | -2.663065000 | -0.501585000 | 0.861246000  |
| 29 | 0.234425000  | -0.224136000 | 0.346780000  |
| 6  | -4.027557000 | -0.618968000 | 1.327014000  |
| 6  | -4.795845000 | 0.529655000  | 1.577737000  |
| 6  | -4.618768000 | -1.877046000 | 1.516572000  |
| 6  | -6.110400000 | 0.421292000  | 2.010490000  |
| 6  | -5.936539000 | -1.980763000 | 1.951201000  |
| 6  | -6.686388000 | -0.834115000 | 2.198962000  |
| 1  | -4.342103000 | 1.511612000  | 1.414677000  |
| 1  | -4.021912000 | -2.774719000 | 1.328384000  |
| 1  | -6.695906000 | 1.326630000  | 2.196023000  |
| 1  | -6.380693000 | -2.968971000 | 2.102177000  |
| 1  | -7.722556000 | -0.917747000 | 2.538297000  |
| 17 | 3.070422000  | 3.236523000  | 1.763344000  |
| 6  | 2.330274000  | 2.493635000  | 0.313098000  |
| 17 | 2.745244000  | 3.460807000  | -1.134709000 |
| 17 | 0.587158000  | 2.506984000  | 0.510151000  |
| 7  | 2.857672000  | 1.155195000  | 0.150262000  |
| 6  | 2.126492000  | -0.007233000 | 0.152714000  |
| 7  | 3.074195000  | -0.981809000 | -0.046169000 |
| 6  | 2.825009000  | -2.403768000 | -0.139174000 |
| 17 | 1.119437000  | -2.792994000 | 0.008391000  |
| 17 | 3.404389000  | -2.994917000 | -1.726276000 |
| 17 | 3.712013000  | -3.237712000 | 1.171725000  |
| 17 | 5.812120000  | -1.265329000 | -0.376996000 |
| 6  | 4.355554000  | -0.434886000 | -0.152202000 |
| 6  | 4.220001000  | 0.901826000  | -0.030350000 |
| 17 | 5.477842000  | 2.031631000  | -0.083718000 |
| 6  | -4.050044000 | -0.801731000 | -1.730705000 |
| 1  | -3.829713000 | -0.922924000 | -2.804646000 |
| 1  | -4.203502000 | -1.821313000 | -1.325899000 |
| 6  | -5.306913000 | 0.001891000  | -1.534615000 |
| 6  | -5.275471000 | 1.397758000  | -1.579925000 |
| 6  | -6.520296000 | -0.643074000 | -1.298481000 |
| 6  | -6.438890000 | 2.133174000  | -1.384831000 |
| 6  | -7.686999000 | 0.091499000  | -1.109624000 |
| 6  | -7.648529000 | 1.482118000  | -1.147801000 |
| 1  | -4.318974000 | 1.904018000  | -1.745259000 |
| 1  | -6.542849000 | -1.736980000 | -1.232750000 |
| 1  | -6.403283000 | 3.225983000  | -1.415308000 |
| 1  | -8.630060000 | -0.426223000 | -0.912745000 |
| 1  | -8.562170000 | 2.061693000  | -0.989384000 |

AC<sub>Bi</sub>\_NHC-Cl

|    |              |              |              |
|----|--------------|--------------|--------------|
| 6  | 0.000767000  | 2.475105000  | -0.000541000 |
| 6  | 0.001995000  | 3.717135000  | -0.000567000 |
| 29 | 1.257912000  | 1.041001000  | -0.001227000 |
| 6  | 0.003535000  | 5.132108000  | -0.000865000 |
| 6  | 0.001791000  | 5.845820000  | -1.215647000 |
| 6  | 0.006882000  | 5.846333000  | 1.213604000  |
| 6  | 0.003357000  | 7.232213000  | -1.210100000 |
| 6  | 0.008469000  | 7.232734000  | 1.207456000  |
| 6  | 0.006710000  | 7.927124000  | -0.001468000 |
| 1  | -0.000798000 | 5.291470000  | -2.157506000 |
| 1  | 0.008208000  | 5.292410000  | 2.155716000  |
| 1  | 0.001977000  | 7.779698000  | -2.155954000 |
| 1  | 0.011084000  | 7.780615000  | 2.153079000  |
| 1  | 0.007965000  | 9.020339000  | -0.001699000 |
| 6  | 2.985914000  | -0.565028000 | 2.472988000  |
| 7  | 3.228393000  | -0.879247000 | 1.072145000  |
| 6  | 2.629598000  | -0.289843000 | -0.003073000 |
| 7  | 3.222264000  | -0.883311000 | -1.079464000 |
| 6  | 2.972735000  | -0.573623000 | -2.480055000 |
| 6  | 4.156273000  | -1.842132000 | -0.680904000 |
| 6  | 4.159865000  | -1.839840000 | 0.671912000  |
| 29 | -1.257723000 | 1.042213000  | 0.000706000  |
| 6  | -2.630555000 | -0.287452000 | 0.003176000  |
| 7  | -3.229766000 | -0.876889000 | -1.071809000 |
| 6  | -2.986883000 | -0.563667000 | -2.472780000 |
| 6  | -4.161765000 | -1.836794000 | -0.671195000 |
| 6  | -4.158171000 | -1.838533000 | 0.681623000  |
| 7  | -3.223665000 | -0.880023000 | 1.079785000  |
| 6  | -2.973914000 | -0.569842000 | 2.480252000  |
| 17 | -2.351536000 | -2.025198000 | 3.290093000  |
| 17 | -1.784236000 | 0.727677000  | 2.665652000  |
| 17 | -4.491227000 | -0.033809000 | 3.231223000  |
| 17 | -1.801595000 | 0.737628000  | -2.661091000 |
| 17 | -4.508360000 | -0.029974000 | -3.216713000 |
| 17 | -2.364376000 | -2.016354000 | -3.287342000 |
| 17 | -5.103482000 | -2.822222000 | -1.662795000 |
| 17 | -5.096154000 | -2.825112000 | 1.675625000  |
| 17 | 1.783674000  | 0.724315000  | -2.666164000 |
| 17 | 2.349799000  | -2.029114000 | -3.289259000 |
| 17 | 4.490351000  | -0.038589000 | -3.231137000 |
| 17 | 5.093721000  | -2.829629000 | -1.674488000 |
| 17 | 5.101300000  | -2.825086000 | 1.663927000  |
| 17 | 2.363260000  | -2.016999000 | 3.288659000  |
| 17 | 4.507707000  | -0.031362000 | 3.216271000  |
| 17 | 1.800914000  | 0.736630000  | 2.660713000  |

RC<sub>Bi</sub>\_NHC-Cl

|    |              |             |              |
|----|--------------|-------------|--------------|
| 29 | -0.673254000 | 1.854369000 | -0.085490000 |
|----|--------------|-------------|--------------|



|    |              |              |              |
|----|--------------|--------------|--------------|
| 6  | 2.139791000  | 3.110281000  | -0.666264000 |
| 6  | 0.966981000  | 2.737969000  | -0.458467000 |
| 7  | -0.905787000 | 5.344067000  | 1.228216000  |
| 7  | -1.883475000 | 3.238423000  | 0.824837000  |
| 7  | -1.441677000 | 4.372493000  | 1.045215000  |
| 6  | -3.786411000 | 2.066842000  | 1.892261000  |
| 6  | -3.449612000 | 2.259249000  | 3.235605000  |
| 6  | -4.652708000 | 1.024495000  | 1.550262000  |
| 6  | -4.021327000 | 1.463684000  | 4.222463000  |
| 1  | -2.763990000 | 3.067465000  | 3.513478000  |
| 6  | -5.210274000 | 0.214256000  | 2.536981000  |
| 1  | -4.928680000 | 0.878117000  | 0.498219000  |
| 6  | -4.912380000 | 0.449049000  | 3.876259000  |
| 1  | -3.777496000 | 1.642776000  | 5.273136000  |
| 1  | -5.899816000 | -0.587888000 | 2.258413000  |
| 1  | -5.371828000 | -0.165134000 | 4.655537000  |
| 6  | -3.340890000 | 3.045473000  | 0.839335000  |
| 1  | -3.845122000 | 4.017302000  | 0.980647000  |
| 1  | -3.634816000 | 2.680891000  | -0.160930000 |
| 6  | 3.431864000  | 3.682271000  | -0.841612000 |
| 6  | 4.520315000  | 2.881082000  | -1.230290000 |
| 6  | 3.639282000  | 5.054815000  | -0.612932000 |
| 6  | 5.781835000  | 3.438451000  | -1.383065000 |
| 1  | 4.351771000  | 1.813040000  | -1.411392000 |
| 6  | 4.904110000  | 5.602143000  | -0.773721000 |
| 1  | 2.795654000  | 5.679934000  | -0.310170000 |
| 6  | 5.977099000  | 4.799215000  | -1.156476000 |
| 1  | 6.621204000  | 2.807446000  | -1.685992000 |
| 1  | 5.056338000  | 6.669949000  | -0.596646000 |
| 1  | 6.970795000  | 5.237124000  | -1.280192000 |
| 6  | -1.759121000 | 0.272391000  | -0.190424000 |
| 7  | -1.882150000 | -0.738104000 | 0.723573000  |
| 7  | -2.718454000 | -0.019164000 | -1.127881000 |
| 6  | -2.879694000 | -1.642192000 | 0.355999000  |
| 6  | -3.410311000 | -1.187287000 | -0.800358000 |
| 17 | -3.313396000 | -3.071181000 | 1.141626000  |
| 17 | -4.659026000 | -1.912625000 | -1.673157000 |
| 6  | -1.054090000 | -0.930000000 | 1.895708000  |
| 17 | -2.066445000 | -1.128668000 | 3.329676000  |
| 17 | -0.057008000 | -2.398745000 | 1.626794000  |
| 17 | 0.030746000  | 0.432629000  | 2.197908000  |
| 6  | -2.985946000 | 0.724357000  | -2.343381000 |
| 17 | -4.689872000 | 1.276464000  | -2.339195000 |
| 17 | -1.951602000 | 2.152017000  | -2.481315000 |
| 17 | -2.711586000 | -0.318927000 | -3.755148000 |
| 29 | 1.656436000  | 0.907399000  | -0.513417000 |
| 6  | 2.216353000  | -0.892905000 | -0.383930000 |
| 7  | 1.795922000  | -1.939620000 | -1.159237000 |
| 7  | 2.958881000  | -1.485985000 | 0.598043000  |
| 6  | 3.651791000  | -0.807128000 | 1.683908000  |

|    |              |              |              |
|----|--------------|--------------|--------------|
| 17 | 3.499994000  | 0.948513000  | 1.582849000  |
| 17 | 5.380900000  | -1.217007000 | 1.602966000  |
| 17 | 2.958486000  | -1.345065000 | 3.234221000  |
| 6  | 2.962678000  | -2.875362000 | 0.460541000  |
| 17 | 3.698460000  | -4.001609000 | 1.477410000  |
| 6  | 2.223571000  | -3.161124000 | -0.636384000 |
| 17 | 1.835534000  | -4.704459000 | -1.198001000 |
| 6  | 0.929508000  | -1.838957000 | -2.314885000 |
| 17 | 1.656500000  | -2.689844000 | -3.689487000 |
| 17 | -0.652322000 | -2.573193000 | -1.891372000 |
| 17 | 0.638073000  | -0.164974000 | -2.803302000 |

TS1<sub>Bi</sub>\_NHC-Cl

|    |              |              |              |
|----|--------------|--------------|--------------|
| 29 | -0.363897000 | 1.665687000  | -0.529474000 |
| 6  | 2.073176000  | 3.329259000  | -0.863110000 |
| 6  | 1.359971000  | 2.285036000  | -0.957424000 |
| 7  | 0.837458000  | 4.762814000  | -0.264289000 |
| 7  | -1.016145000 | 3.427544000  | -0.010181000 |
| 7  | -0.260602000 | 4.445050000  | -0.032054000 |
| 6  | -2.825524000 | 3.018722000  | 1.641664000  |
| 6  | -2.145093000 | 3.375696000  | 2.810045000  |
| 6  | -3.960851000 | 2.208176000  | 1.738961000  |
| 6  | -2.638895000 | 2.996489000  | 4.053846000  |
| 1  | -1.245087000 | 3.997261000  | 2.740608000  |
| 6  | -4.448104000 | 1.815417000  | 2.984112000  |
| 1  | -4.497102000 | 1.924843000  | 0.823246000  |
| 6  | -3.801267000 | 2.232215000  | 4.144071000  |
| 1  | -2.119906000 | 3.311419000  | 4.963367000  |
| 1  | -5.351314000 | 1.201820000  | 3.048425000  |
| 1  | -4.197827000 | 1.951936000  | 5.123848000  |
| 6  | -2.424912000 | 3.603822000  | 0.311389000  |
| 1  | -2.675858000 | 4.677546000  | 0.281861000  |
| 1  | -3.018911000 | 3.126970000  | -0.489697000 |
| 6  | 3.367254000  | 3.946215000  | -0.971390000 |
| 6  | 4.377448000  | 3.182530000  | -1.593681000 |
| 6  | 3.691474000  | 5.215157000  | -0.471449000 |
| 6  | 5.669130000  | 3.673263000  | -1.702538000 |
| 1  | 4.116092000  | 2.200459000  | -2.004429000 |
| 6  | 4.989611000  | 5.697901000  | -0.588615000 |
| 1  | 2.923394000  | 5.819853000  | 0.011002000  |
| 6  | 5.980897000  | 4.935285000  | -1.199195000 |
| 1  | 6.438647000  | 3.070689000  | -2.192085000 |
| 1  | 5.229921000  | 6.688745000  | -0.194529000 |
| 1  | 6.997941000  | 5.325489000  | -1.287812000 |
| 6  | -1.742885000 | 0.381836000  | -0.119240000 |
| 7  | -1.860483000 | -0.386478000 | 1.003713000  |
| 7  | -2.876376000 | 0.106018000  | -0.831927000 |
| 6  | -3.037813000 | -1.135029000 | 0.983120000  |
| 6  | -3.683741000 | -0.814898000 | -0.161630000 |

|    |              |              |              |
|----|--------------|--------------|--------------|
| 17 | -3.525979000 | -2.308146000 | 2.092469000  |
| 17 | -5.162709000 | -1.441189000 | -0.676509000 |
| 6  | -0.892007000 | -0.484836000 | 2.080655000  |
| 17 | -1.686473000 | -0.237366000 | 3.635808000  |
| 17 | -0.157215000 | -2.125042000 | 2.008185000  |
| 17 | 0.404598000  | 0.705591000  | 1.950710000  |
| 6  | -3.212064000 | 0.625296000  | -2.146204000 |
| 17 | -4.765374000 | 1.499437000  | -2.054664000 |
| 17 | -1.983415000 | 1.747837000  | -2.746754000 |
| 17 | -3.350945000 | -0.726966000 | -3.292111000 |
| 29 | 1.644756000  | 0.387002000  | -0.990778000 |
| 6  | 1.943547000  | -1.461154000 | -0.596390000 |
| 7  | 1.248990000  | -2.553871000 | -1.024419000 |
| 7  | 2.773925000  | -1.949234000 | 0.367273000  |
| 6  | 3.744040000  | -1.176412000 | 1.131790000  |
| 17 | 3.807115000  | 0.516503000  | 0.602801000  |
| 17 | 5.354393000  | -1.885510000 | 0.894784000  |
| 17 | 3.285737000  | -1.217026000 | 2.847331000  |
| 6  | 2.563658000  | -3.312606000 | 0.573991000  |
| 17 | 3.324518000  | -4.302062000 | 1.705988000  |
| 6  | 1.595526000  | -3.691379000 | -0.294317000 |
| 17 | 0.890809000  | -5.220269000 | -0.392937000 |
| 6  | 0.216868000  | -2.549974000 | -2.043076000 |
| 17 | 0.564701000  | -3.794696000 | -3.253794000 |
| 17 | -1.355237000 | -2.872648000 | -1.247479000 |
| 17 | 0.106716000  | -0.995156000 | -2.877687000 |

TS1'<sub>Bi</sub>\_NHC-Cl

|    |              |              |              |
|----|--------------|--------------|--------------|
| 29 | -0.962368000 | -0.766922000 | 0.961073000  |
| 6  | -3.356256000 | 0.954960000  | 0.552522000  |
| 6  | -2.146500000 | 0.596889000  | 0.379535000  |
| 7  | -4.187982000 | -0.173293000 | 1.958203000  |
| 7  | -2.255407000 | -1.353866000 | 2.345128000  |
| 7  | -3.372250000 | -1.011565000 | 2.376815000  |
| 6  | -4.470296000 | 1.782997000  | 0.156552000  |
| 6  | -5.235571000 | 2.491396000  | 1.093890000  |
| 6  | -4.800546000 | 1.868898000  | -1.205738000 |
| 6  | -6.318445000 | 3.255788000  | 0.677177000  |
| 1  | -4.967791000 | 2.430396000  | 2.153677000  |
| 6  | -5.883277000 | 2.635431000  | -1.613966000 |
| 1  | -4.208623000 | 1.300854000  | -1.930058000 |
| 6  | -6.649320000 | 3.323995000  | -0.675045000 |
| 1  | -6.908216000 | 3.808758000  | 1.413263000  |
| 1  | -6.139659000 | 2.688430000  | -2.675512000 |
| 1  | -7.505082000 | 3.922203000  | -0.998774000 |
| 6  | 0.664049000  | -1.837845000 | 0.927032000  |
| 7  | 1.867425000  | -1.584438000 | 1.521590000  |
| 7  | 0.849168000  | -3.043745000 | 0.313900000  |
| 6  | 2.784805000  | -2.608402000 | 1.273941000  |

|    |              |              |              |
|----|--------------|--------------|--------------|
| 6  | 2.138077000  | -3.534426000 | 0.530690000  |
| 17 | 4.414526000  | -2.652158000 | 1.708399000  |
| 17 | 2.795599000  | -4.977346000 | -0.042707000 |
| 6  | 2.219427000  | -0.390806000 | 2.267008000  |
| 17 | 2.864311000  | -0.844450000 | 3.853899000  |
| 17 | 3.454510000  | 0.503060000  | 1.318888000  |
| 17 | 0.843766000  | 0.683963000  | 2.524681000  |
| 6  | -0.139696000 | -3.780260000 | -0.459085000 |
| 17 | -0.456948000 | -5.330996000 | 0.344403000  |
| 17 | -1.666774000 | -2.893310000 | -0.595448000 |
| 17 | 0.488102000  | -4.047913000 | -2.103058000 |
| 29 | -0.526391000 | 1.239887000  | -0.395380000 |
| 6  | 1.222513000  | 1.800782000  | -0.905624000 |
| 7  | 2.121143000  | 1.162997000  | -1.712871000 |
| 7  | 1.914655000  | 2.873894000  | -0.423873000 |
| 6  | 1.397362000  | 3.892351000  | 0.478726000  |
| 17 | -0.306497000 | 3.616891000  | 0.872379000  |
| 17 | 1.537842000  | 5.478869000  | -0.306082000 |
| 17 | 2.334592000  | 3.857362000  | 1.989932000  |
| 6  | 3.227832000  | 2.884570000  | -0.894018000 |
| 17 | 4.438851000  | 3.993935000  | -0.514943000 |
| 6  | 3.361381000  | 1.802894000  | -1.696830000 |
| 17 | 4.780688000  | 1.298045000  | -2.455428000 |
| 6  | 1.879273000  | -0.060106000 | -2.453426000 |
| 17 | 2.292351000  | 0.183247000  | -4.160021000 |
| 17 | 2.894708000  | -1.353297000 | -1.740948000 |
| 17 | 0.193871000  | -0.580954000 | -2.367891000 |
| 6  | -6.050490000 | -0.772214000 | 0.474514000  |
| 6  | -5.238352000 | -1.501740000 | -0.397600000 |
| 6  | -7.255312000 | -0.247304000 | 0.009125000  |
| 6  | -5.623724000 | -1.695804000 | -1.718894000 |
| 1  | -4.281104000 | -1.900510000 | -0.037493000 |
| 6  | -7.646500000 | -0.448381000 | -1.311118000 |
| 1  | -7.881132000 | 0.347186000  | 0.684427000  |
| 6  | -6.828367000 | -1.166032000 | -2.178893000 |
| 1  | -4.983283000 | -2.266041000 | -2.397396000 |
| 1  | -8.590572000 | -0.028647000 | -1.668576000 |
| 1  | -7.130585000 | -1.317180000 | -3.218507000 |
| 6  | -5.613215000 | -0.515410000 | 1.892400000  |
| 1  | -5.784800000 | -1.393281000 | 2.536212000  |
| 1  | -6.195004000 | 0.314547000  | 2.321211000  |

IC<sub>Bi</sub>\_NHC-Cl

|    |              |             |              |
|----|--------------|-------------|--------------|
| 29 | -0.407123000 | 1.627448000 | -0.562145000 |
| 6  | 1.753083000  | 3.534007000 | -0.805027000 |
| 6  | 1.235719000  | 2.324948000 | -0.970931000 |
| 7  | 0.937223000  | 4.618072000 | -0.338767000 |
| 7  | -0.948120000 | 3.397572000 | -0.114424000 |
| 7  | -0.258652000 | 4.484788000 | -0.062590000 |

|    |              |              |              |
|----|--------------|--------------|--------------|
| 6  | -2.737079000 | 3.006010000  | 1.580509000  |
| 6  | -2.028246000 | 3.405315000  | 2.718002000  |
| 6  | -3.884643000 | 2.221384000  | 1.736969000  |
| 6  | -2.503890000 | 3.090640000  | 3.986948000  |
| 1  | -1.123530000 | 4.012570000  | 2.599161000  |
| 6  | -4.357109000 | 1.899168000  | 3.007684000  |
| 1  | -4.443985000 | 1.907493000  | 0.844944000  |
| 6  | -3.679053000 | 2.355286000  | 4.134767000  |
| 1  | -1.962627000 | 3.438562000  | 4.871193000  |
| 1  | -5.271942000 | 1.309709000  | 3.117551000  |
| 1  | -4.062189000 | 2.129572000  | 5.133805000  |
| 6  | -2.359468000 | 3.533040000  | 0.220088000  |
| 1  | -2.623473000 | 4.602436000  | 0.151909000  |
| 1  | -2.959630000 | 3.017563000  | -0.550862000 |
| 6  | 3.163602000  | 3.900344000  | -1.007951000 |
| 6  | 4.013087000  | 3.049361000  | -1.733224000 |
| 6  | 3.686894000  | 5.076849000  | -0.460700000 |
| 6  | 5.358686000  | 3.353267000  | -1.885461000 |
| 1  | 3.591177000  | 2.156937000  | -2.213729000 |
| 6  | 5.034846000  | 5.379732000  | -0.620388000 |
| 1  | 3.023144000  | 5.746064000  | 0.091833000  |
| 6  | 5.874581000  | 4.521035000  | -1.325164000 |
| 1  | 6.007242000  | 2.688206000  | -2.461744000 |
| 1  | 5.435516000  | 6.300467000  | -0.188106000 |
| 1  | 6.932150000  | 4.767466000  | -1.450066000 |
| 6  | -1.785483000 | 0.335883000  | -0.107007000 |
| 7  | -1.871822000 | -0.418287000 | 1.026945000  |
| 7  | -2.917401000 | 0.028208000  | -0.803679000 |
| 6  | -3.035629000 | -1.186896000 | 1.032212000  |
| 6  | -3.702104000 | -0.893431000 | -0.109099000 |
| 17 | -3.485986000 | -2.357287000 | 2.159485000  |
| 17 | -5.177704000 | -1.549101000 | -0.593541000 |
| 6  | -0.894133000 | -0.476348000 | 2.101444000  |
| 17 | -1.683586000 | -0.217434000 | 3.654861000  |
| 17 | -0.121773000 | -2.101631000 | 2.050159000  |
| 17 | 0.377774000  | 0.735308000  | 1.940598000  |
| 6  | -3.280440000 | 0.521873000  | -2.124127000 |
| 17 | -4.835880000 | 1.383619000  | -2.015061000 |
| 17 | -2.073149000 | 1.640457000  | -2.772808000 |
| 17 | -3.421185000 | -0.856656000 | -3.238678000 |
| 29 | 1.693273000  | 0.486500000  | -0.994379000 |
| 6  | 1.956793000  | -1.382736000 | -0.592148000 |
| 7  | 1.271048000  | -2.491686000 | -0.986275000 |
| 7  | 2.809930000  | -1.840468000 | 0.365731000  |
| 6  | 3.785065000  | -1.037698000 | 1.090268000  |
| 17 | 3.831841000  | 0.636691000  | 0.477721000  |
| 17 | 5.397252000  | -1.738972000 | 0.857980000  |
| 17 | 3.348883000  | -1.010317000 | 2.807912000  |
| 6  | 2.623126000  | -3.200936000 | 0.604142000  |
| 17 | 3.404074000  | -4.147372000 | 1.757628000  |

|    |              |              |              |
|----|--------------|--------------|--------------|
| 6  | 1.649144000  | -3.610975000 | -0.243479000 |
| 17 | 0.972206000  | -5.153276000 | -0.305622000 |
| 6  | 0.233131000  | -2.532626000 | -2.000739000 |
| 17 | 0.620515000  | -3.779619000 | -3.197038000 |
| 17 | -1.322086000 | -2.900536000 | -1.193561000 |
| 17 | 0.067713000  | -0.992576000 | -2.847731000 |

TS2<sub>Bi</sub>\_NHC-Cl

|    |              |              |              |
|----|--------------|--------------|--------------|
| 29 | 0.559319000  | -1.561478000 | -0.580432000 |
| 6  | -1.612661000 | -3.567878000 | -0.918872000 |
| 6  | -0.949466000 | -2.424435000 | -1.082963000 |
| 7  | -1.000089000 | -4.700087000 | -0.376890000 |
| 7  | 0.849916000  | -3.455516000 | -0.258541000 |
| 7  | 0.214732000  | -4.572132000 | -0.103790000 |
| 6  | 2.666678000  | -3.090828000 | 1.428461000  |
| 6  | 1.967493000  | -3.530768000 | 2.556547000  |
| 6  | 3.808482000  | -2.301264000 | 1.604232000  |
| 6  | 2.441100000  | -3.240922000 | 3.832207000  |
| 1  | 1.069345000  | -4.144679000 | 2.424825000  |
| 6  | 4.283159000  | -2.010970000 | 2.881487000  |
| 1  | 4.360407000  | -1.954914000 | 0.720232000  |
| 6  | 3.610564000  | -2.500712000 | 3.997372000  |
| 1  | 1.904359000  | -3.616095000 | 4.707977000  |
| 1  | 5.194519000  | -1.418690000 | 3.004417000  |
| 1  | 3.992254000  | -2.296059000 | 5.001477000  |
| 6  | 2.284043000  | -3.571044000 | 0.052183000  |
| 1  | 2.559924000  | -4.633913000 | -0.059600000 |
| 1  | 2.865680000  | -3.017724000 | -0.705100000 |
| 6  | -3.053120000 | -3.645246000 | -1.206187000 |
| 6  | -3.617867000 | -2.852917000 | -2.219420000 |
| 6  | -3.884337000 | -4.435999000 | -0.405108000 |
| 6  | -4.995096000 | -2.825683000 | -2.402720000 |
| 1  | -2.953991000 | -2.290108000 | -2.887708000 |
| 6  | -5.261837000 | -4.403295000 | -0.594942000 |
| 1  | -3.432490000 | -5.065793000 | 0.366456000  |
| 6  | -5.819924000 | -3.594040000 | -1.583442000 |
| 1  | -5.428312000 | -2.216435000 | -3.200297000 |
| 1  | -5.909355000 | -5.018952000 | 0.035125000  |
| 1  | -6.903198000 | -3.577363000 | -1.728597000 |
| 6  | 1.862561000  | -0.255489000 | -0.075479000 |
| 7  | 1.907879000  | 0.465442000  | 1.080942000  |
| 7  | 2.974572000  | 0.129245000  | -0.762992000 |
| 6  | 3.032454000  | 1.290273000  | 1.111889000  |
| 6  | 3.714752000  | 1.063484000  | -0.036254000 |
| 17 | 3.419918000  | 2.447209000  | 2.275993000  |
| 17 | 5.162210000  | 1.795557000  | -0.493772000 |
| 6  | 0.914510000  | 0.446401000  | 2.142242000  |
| 17 | 1.692616000  | 0.183163000  | 3.701422000  |
| 17 | 0.063800000  | 2.032506000  | 2.124569000  |

|    |              |              |              |
|----|--------------|--------------|--------------|
| 17 | -0.298213000 | -0.818524000 | 1.928449000  |
| 6  | 3.364423000  | -0.316964000 | -2.092080000 |
| 17 | 4.939564000  | -1.139876000 | -1.985247000 |
| 17 | 2.198794000  | -1.451560000 | -2.795206000 |
| 17 | 3.470655000  | 1.093509000  | -3.168389000 |
| 29 | -1.601118000 | -0.612681000 | -1.082119000 |
| 6  | -1.985057000 | 1.207837000  | -0.565854000 |
| 7  | -1.367758000 | 2.372036000  | -0.918753000 |
| 7  | -2.852708000 | 1.577390000  | 0.418259000  |
| 6  | -3.765804000 | 0.693474000  | 1.132326000  |
| 17 | -3.682768000 | -0.969524000 | 0.511553000  |
| 17 | -5.425669000 | 1.278713000  | 0.908365000  |
| 17 | -3.328774000 | 0.685991000  | 2.853114000  |
| 6  | -2.754449000 | 2.939801000  | 0.698307000  |
| 17 | -3.594196000 | 3.802515000  | 1.876096000  |
| 6  | -1.812452000 | 3.438825000  | -0.136116000 |
| 17 | -1.225594000 | 5.019276000  | -0.137712000 |
| 6  | -0.336305000 | 2.520120000  | -1.928711000 |
| 17 | -0.803746000 | 3.787167000  | -3.074686000 |
| 17 | 1.196534000  | 2.952210000  | -1.107065000 |
| 17 | -0.067714000 | 1.030851000  | -2.837924000 |

#### P<sub>Bi</sub>\_NHC-Cl

|    |              |              |              |
|----|--------------|--------------|--------------|
| 7  | -0.129653000 | 1.803052000  | -2.906024000 |
| 7  | -0.282244000 | 3.005170000  | -3.446910000 |
| 7  | -0.545993000 | 3.838629000  | -2.498558000 |
| 6  | -0.240737000 | 1.827888000  | -1.526789000 |
| 6  | -0.524753000 | 3.189543000  | -1.306245000 |
| 29 | 1.104129000  | 0.674426000  | -0.650082000 |
| 6  | 0.478991000  | 0.748507000  | -3.677233000 |
| 1  | -0.076899000 | -0.196935000 | -3.533136000 |
| 1  | 0.384690000  | 1.031799000  | -4.738564000 |
| 6  | 1.924272000  | 0.560259000  | -3.270776000 |
| 6  | 2.537500000  | -0.692987000 | -3.344595000 |
| 6  | 2.668623000  | 1.656591000  | -2.809764000 |
| 6  | 3.860834000  | -0.856790000 | -2.936692000 |
| 6  | 3.991232000  | 1.491642000  | -2.413028000 |
| 6  | 4.587246000  | 0.231875000  | -2.458914000 |
| 1  | 1.967229000  | -1.553616000 | -3.712996000 |
| 1  | 2.208503000  | 2.651680000  | -2.769210000 |
| 1  | 4.329695000  | -1.843692000 | -2.998485000 |
| 1  | 4.560189000  | 2.360037000  | -2.070866000 |
| 1  | 5.627694000  | 0.104470000  | -2.143321000 |
| 6  | -0.737865000 | 3.913782000  | -0.056109000 |
| 6  | -0.989915000 | 5.293235000  | -0.091045000 |
| 6  | -0.667083000 | 3.272521000  | 1.190193000  |
| 6  | -1.161875000 | 6.006596000  | 1.088214000  |
| 6  | -0.831595000 | 3.992571000  | 2.367007000  |
| 6  | -1.079905000 | 5.362563000  | 2.320829000  |

|    |              |              |              |
|----|--------------|--------------|--------------|
| 1  | -1.045230000 | 5.790943000  | -1.062568000 |
| 1  | -0.467696000 | 2.193889000  | 1.240219000  |
| 1  | -1.359389000 | 7.080958000  | 1.045752000  |
| 1  | -0.758892000 | 3.481916000  | 3.331362000  |
| 1  | -1.209161000 | 5.928463000  | 3.246988000  |
| 6  | 3.799159000  | 1.277777000  | 1.247421000  |
| 7  | 3.550575000  | -0.072330000 | 0.762178000  |
| 6  | 2.434402000  | -0.491592000 | 0.099606000  |
| 7  | 2.606334000  | -1.842141000 | -0.023362000 |
| 6  | 1.646067000  | -2.799380000 | -0.548156000 |
| 6  | 3.813438000  | -2.250057000 | 0.551947000  |
| 6  | 4.405608000  | -1.138014000 | 1.044399000  |
| 29 | -1.331454000 | 0.481287000  | -0.612590000 |
| 6  | -2.776832000 | -0.483225000 | 0.191762000  |
| 7  | -3.969290000 | -0.752525000 | -0.409154000 |
| 6  | -4.213072000 | -0.743381000 | -1.842040000 |
| 6  | -4.966817000 | -1.007765000 | 0.533912000  |
| 6  | -4.371294000 | -0.950838000 | 1.748961000  |
| 7  | -3.020530000 | -0.681354000 | 1.517765000  |
| 6  | -2.030362000 | -0.573331000 | 2.576535000  |
| 17 | 0.219944000  | -2.016506000 | -1.256716000 |
| 17 | 2.399072000  | -3.796648000 | -1.814228000 |
| 17 | 1.095096000  | -3.828724000 | 0.796880000  |
| 17 | 4.409468000  | -3.822902000 | 0.680678000  |
| 17 | 5.867102000  | -1.084013000 | 1.883260000  |
| 17 | 3.783911000  | 1.237922000  | 3.027420000  |
| 17 | 5.375039000  | 1.852395000  | 0.665924000  |
| 17 | 2.551181000  | 2.419823000  | 0.708734000  |
| 17 | -0.380093000 | -0.533675000 | 1.901670000  |
| 17 | -2.123512000 | -1.997310000 | 3.631704000  |
| 17 | -2.332036000 | 0.917543000  | 3.485589000  |
| 17 | -5.142738000 | -1.057024000 | 3.243699000  |
| 17 | -6.604848000 | -1.262863000 | 0.232819000  |
| 17 | -5.296084000 | 0.597776000  | -2.239405000 |
| 17 | -4.914819000 | -2.299005000 | -2.324958000 |
| 17 | -2.692819000 | -0.542263000 | -2.756341000 |

AC<sub>Mo</sub>\_NHC-Br

|    |             |              |              |
|----|-------------|--------------|--------------|
| 6  | 3.546934000 | -0.002329000 | 0.000857000  |
| 6  | 4.772110000 | -0.002794000 | 0.137452000  |
| 29 | 1.701494000 | -0.000727000 | -0.216713000 |
| 6  | 6.181498000 | -0.003504000 | 0.303736000  |
| 6  | 7.045049000 | 0.098420000  | -0.804679000 |
| 6  | 6.758131000 | -0.105970000 | 1.585135000  |
| 6  | 8.422859000 | 0.097543000  | -0.634597000 |
| 6  | 8.136915000 | -0.105405000 | 1.745897000  |
| 6  | 8.978061000 | -0.003912000 | 0.639467000  |
| 1  | 6.608658000 | 0.178255000  | -1.803820000 |
| 1  | 6.097175000 | -0.185778000 | 2.452151000  |



|    |              |              |              |
|----|--------------|--------------|--------------|
| 1  | 9.074519000  | 0.177599000  | -1.509573000 |
| 1  | 8.562951000  | -0.185658000 | 2.750240000  |
| 1  | 10.063483000 | -0.004007000 | 0.769806000  |
| 35 | -0.830568000 | -3.401568000 | 1.486397000  |
| 6  | -0.631629000 | -2.468849000 | -0.211385000 |
| 35 | -1.752178000 | -3.298513000 | -1.583008000 |
| 35 | 1.186736000  | -2.703877000 | -0.789288000 |
| 7  | -1.019738000 | -1.082667000 | -0.051527000 |
| 6  | -0.187914000 | 0.000364000  | -0.192935000 |
| 7  | -1.018642000 | 1.083626000  | -0.046670000 |
| 6  | -0.629093000 | 2.470099000  | -0.200181000 |
| 35 | 1.189620000  | 2.706087000  | -0.776403000 |
| 35 | -1.748545000 | 3.307150000  | -1.568390000 |
| 35 | -0.827634000 | 3.395478000  | 1.501634000  |
| 35 | -3.779077000 | 1.724530000  | 0.681913000  |
| 6  | -2.320826000 | 0.677800000  | 0.263192000  |
| 6  | -2.321551000 | -0.676880000 | 0.260166000  |
| 35 | -3.780774000 | -1.723959000 | 0.674587000  |

TS1<sub>Mo</sub>\_NHC-Br

|    |              |              |              |
|----|--------------|--------------|--------------|
| 7  | -1.938109000 | -0.138579000 | 1.932451000  |
| 7  | -3.116418000 | -0.251894000 | 2.399684000  |
| 7  | -4.189254000 | -0.540034000 | 2.004319000  |
| 6  | -3.260785000 | -0.708977000 | -0.351933000 |
| 6  | -4.430685000 | -0.775562000 | 0.134294000  |
| 29 | -1.446944000 | -0.463640000 | -0.039634000 |
| 6  | -0.971458000 | 0.549977000  | 2.769489000  |
| 1  | -0.736547000 | 1.529354000  | 2.302969000  |
| 1  | -1.424287000 | 0.769241000  | 3.752500000  |
| 6  | 0.313727000  | -0.214429000 | 2.925340000  |
| 6  | 1.530118000  | 0.470049000  | 2.929686000  |
| 6  | 0.315686000  | -1.605928000 | 3.048203000  |
| 6  | 2.733330000  | -0.218191000 | 3.045303000  |
| 6  | 1.517048000  | -2.295023000 | 3.172771000  |
| 6  | 2.729062000  | -1.605587000 | 3.162622000  |
| 1  | 1.529856000  | 1.558669000  | 2.779147000  |
| 1  | -0.636243000 | -2.147305000 | 3.027876000  |
| 1  | 3.680581000  | 0.330435000  | 3.004402000  |
| 1  | 1.510747000  | -3.385504000 | 3.259176000  |
| 1  | 3.673486000  | -2.153788000 | 3.230107000  |
| 6  | -5.843005000 | -0.964672000 | -0.092628000 |
| 6  | -6.819190000 | -0.841431000 | 0.906701000  |
| 6  | -6.254435000 | -1.283968000 | -1.400998000 |
| 6  | -8.162004000 | -1.032120000 | 0.599988000  |
| 6  | -7.595894000 | -1.472082000 | -1.696462000 |
| 6  | -8.558621000 | -1.347183000 | -0.696004000 |
| 1  | -6.518809000 | -0.595240000 | 1.925278000  |
| 1  | -5.492280000 | -1.383879000 | -2.179109000 |
| 1  | -8.911088000 | -0.932239000 | 1.390442000  |

|    |              |              |              |
|----|--------------|--------------|--------------|
| 1  | -7.894605000 | -1.720789000 | -2.718516000 |
| 1  | -9.616558000 | -1.496153000 | -0.927940000 |
| 35 | 1.627571000  | -2.345795000 | -2.618155000 |
| 6  | 1.342057000  | -2.284429000 | -0.676538000 |
| 35 | 2.526489000  | -3.596237000 | 0.139555000  |
| 35 | -0.467475000 | -2.923481000 | -0.295308000 |
| 7  | 1.495388000  | -0.959796000 | -0.211352000 |
| 6  | 0.424813000  | -0.046808000 | -0.127727000 |
| 7  | 0.917692000  | 1.160864000  | -0.006185000 |
| 6  | -0.610238000 | 3.302200000  | -0.559193000 |
| 35 | -1.995123000 | 2.146514000  | -0.580792000 |
| 35 | -0.073355000 | 4.105151000  | 1.004578000  |
| 35 | 0.352332000  | 3.628944000  | -2.088688000 |
| 35 | 3.350886000  | 2.570928000  | 0.180782000  |
| 6  | 2.264389000  | 1.085693000  | -0.073672000 |
| 6  | 2.674414000  | -0.206073000 | -0.224375000 |
| 35 | 4.409591000  | -0.810422000 | -0.350502000 |

TS1'<sub>Mo</sub>\_NHC-Br

|    |              |              |              |
|----|--------------|--------------|--------------|
| 7  | -0.742505000 | -0.700363000 | -1.168056000 |
| 7  | -1.751092000 | -0.815028000 | -1.779274000 |
| 7  | -2.923429000 | -1.254415000 | -1.631902000 |
| 6  | -2.305736000 | -1.610206000 | 0.954278000  |
| 6  | -3.342704000 | -1.763200000 | 0.231377000  |
| 29 | -0.607400000 | -0.942237000 | 0.821031000  |
| 6  | -4.756462000 | -2.052484000 | 0.185920000  |
| 6  | -5.609649000 | -1.430942000 | 1.113802000  |
| 6  | -5.316370000 | -2.904040000 | -0.777531000 |
| 6  | -6.980900000 | -1.638865000 | 1.060771000  |
| 6  | -6.691249000 | -3.103498000 | -0.830169000 |
| 6  | -7.529886000 | -2.466821000 | 0.082880000  |
| 1  | -5.169928000 | -0.758768000 | 1.857128000  |
| 1  | -4.650124000 | -3.398496000 | -1.491957000 |
| 1  | -7.632099000 | -1.137813000 | 1.782755000  |
| 1  | -7.113807000 | -3.768813000 | -1.588840000 |
| 1  | -8.611118000 | -2.622786000 | 0.036646000  |
| 35 | 1.224502000  | 3.773066000  | 1.560674000  |
| 6  | 0.316937000  | 2.275155000  | 0.698138000  |
| 35 | -0.557729000 | 2.864074000  | -0.938587000 |
| 35 | -1.055004000 | 1.699524000  | 1.929196000  |
| 7  | 1.268568000  | 1.236767000  | 0.392444000  |
| 6  | 1.121625000  | -0.074159000 | 0.753381000  |
| 7  | 2.225128000  | -0.695882000 | 0.244064000  |
| 6  | 2.472981000  | -2.112325000 | 0.363813000  |
| 35 | 1.298901000  | -2.968586000 | 1.636806000  |
| 35 | 2.210935000  | -2.954694000 | -1.366626000 |
| 35 | 4.284368000  | -2.422265000 | 1.017197000  |
| 35 | 4.467673000  | -0.182096000 | -1.555792000 |
| 6  | 2.987738000  | 0.189572000  | -0.523479000 |

|    |              |              |              |
|----|--------------|--------------|--------------|
| 6  | 2.391158000  | 1.403263000  | -0.425705000 |
| 35 | 2.965873000  | 2.933840000  | -1.275265000 |
| 6  | -3.978888000 | -0.592910000 | -2.396656000 |
| 1  | -3.521286000 | -0.113662000 | -3.277868000 |
| 1  | -4.681538000 | -1.349313000 | -2.778671000 |
| 6  | -4.724737000 | 0.415194000  | -1.559120000 |
| 6  | -4.042326000 | 1.193907000  | -0.619139000 |
| 6  | -6.108591000 | 0.540834000  | -1.673509000 |
| 6  | -4.737291000 | 2.086384000  | 0.188369000  |
| 6  | -6.804748000 | 1.436775000  | -0.867140000 |
| 6  | -6.121211000 | 2.208723000  | 0.068305000  |
| 1  | -2.960929000 | 1.067513000  | -0.488206000 |
| 1  | -6.650089000 | -0.099898000 | -2.379429000 |
| 1  | -4.192299000 | 2.685980000  | 0.924597000  |
| 1  | -7.891766000 | 1.517306000  | -0.955655000 |
| 1  | -6.668455000 | 2.903785000  | 0.711080000  |

AC<sub>Bi</sub>\_NHC-Br

|    |              |              |              |
|----|--------------|--------------|--------------|
| 6  | 0.000628000  | -3.379155000 | -0.001929000 |
| 6  | 0.001494000  | -4.620533000 | -0.001368000 |
| 29 | 1.071326000  | -1.874151000 | 0.572720000  |
| 6  | 0.002446000  | -6.036425000 | -0.000793000 |
| 6  | -0.416144000 | -6.751477000 | 1.138807000  |
| 6  | 0.421978000  | -6.751921000 | -1.139760000 |
| 6  | -0.409280000 | -8.138165000 | 1.135227000  |
| 6  | 0.416956000  | -8.138616000 | -1.134946000 |
| 6  | 0.004304000  | -8.834150000 | 0.000448000  |
| 1  | -0.740290000 | -6.197933000 | 2.023803000  |
| 1  | 0.745379000  | -6.198738000 | -2.025253000 |
| 1  | -0.731693000 | -8.684960000 | 2.024980000  |
| 1  | 0.740086000  | -8.685770000 | -2.024217000 |
| 1  | 0.005033000  | -9.927283000 | 0.000929000  |
| 6  | 4.064571000  | -0.644674000 | -0.303518000 |
| 7  | 3.139553000  | 0.182050000  | 0.450403000  |
| 6  | 1.954538000  | -0.237637000 | 0.984937000  |
| 7  | 1.484081000  | 0.842767000  | 1.676168000  |
| 6  | 0.269520000  | 0.876743000  | 2.466318000  |
| 6  | 2.331611000  | 1.943702000  | 1.513700000  |
| 6  | 3.376462000  | 1.524640000  | 0.754853000  |
| 29 | -1.070926000 | -1.874390000 | -0.575290000 |
| 6  | -1.954600000 | -0.237641000 | -0.985708000 |
| 7  | -3.139805000 | 0.180917000  | -0.450713000 |
| 6  | -4.064422000 | -0.647040000 | 0.302349000  |
| 6  | -3.377366000 | 1.523714000  | -0.753707000 |
| 6  | -2.332743000 | 1.944086000  | -1.512131000 |
| 7  | -1.484672000 | 0.843729000  | -1.675788000 |
| 6  | -0.270067000 | 0.879198000  | -2.465813000 |
| 35 | 1.021580000  | 2.063578000  | -1.604116000 |
| 35 | 0.586632000  | -0.843361000 | -2.671080000 |

|    |              |              |              |
|----|--------------|--------------|--------------|
| 35 | -0.669534000 | 1.491867000  | -4.263061000 |
| 35 | -3.457487000 | -2.483178000 | 0.472869000  |
| 35 | -5.769688000 | -0.708424000 | -0.622073000 |
| 35 | -4.281294000 | 0.039773000  | 2.103754000  |
| 35 | -4.762140000 | 2.590491000  | -0.183666000 |
| 35 | -2.060321000 | 3.683369000  | -2.047179000 |
| 35 | -0.586192000 | -0.846523000 | 2.669813000  |
| 35 | -1.022909000 | 2.061300000  | 1.605997000  |
| 35 | 0.668809000  | 1.487747000  | 4.264156000  |
| 35 | 2.058243000  | 3.682299000  | 2.050520000  |
| 35 | 4.760705000  | 2.592751000  | 0.185990000  |
| 35 | 4.281110000  | 0.044206000  | -2.104190000 |
| 35 | 5.769841000  | -0.706186000 | 0.620882000  |
| 35 | 3.458545000  | -2.480901000 | -0.475989000 |

TS1<sub>Bi</sub>\_NHC-Br

|    |              |              |              |
|----|--------------|--------------|--------------|
| 29 | -0.855562000 | 1.997610000  | -0.456538000 |
| 6  | 1.123568000  | 4.085314000  | -1.201708000 |
| 6  | 0.629234000  | 2.918974000  | -1.157977000 |
| 7  | -0.228368000 | 5.296325000  | -0.384864000 |
| 7  | -1.731122000 | 3.647909000  | 0.174473000  |
| 7  | -1.194213000 | 4.785101000  | 0.024274000  |
| 6  | -3.233498000 | 3.055762000  | 2.079479000  |
| 6  | -2.532617000 | 3.647029000  | 3.135515000  |
| 6  | -4.183446000 | 2.069394000  | 2.363577000  |
| 6  | -2.835293000 | 3.315581000  | 4.451568000  |
| 1  | -1.774157000 | 4.408371000  | 2.918798000  |
| 6  | -4.488246000 | 1.737433000  | 3.682159000  |
| 1  | -4.730418000 | 1.597973000  | 1.536124000  |
| 6  | -3.830812000 | 2.378442000  | 4.727989000  |
| 1  | -2.305034000 | 3.807443000  | 5.271750000  |
| 1  | -5.255122000 | 0.986780000  | 3.892536000  |
| 1  | -4.087419000 | 2.142062000  | 5.764486000  |
| 6  | -3.096265000 | 3.583400000  | 0.674250000  |
| 1  | -3.556605000 | 4.584056000  | 0.609554000  |
| 1  | -3.673752000 | 2.936788000  | -0.010556000 |
| 6  | 2.237045000  | 4.926242000  | -1.544858000 |
| 6  | 3.157250000  | 4.411860000  | -2.483754000 |
| 6  | 2.489915000  | 6.179037000  | -0.967266000 |
| 6  | 4.300008000  | 5.124584000  | -2.817486000 |
| 1  | 2.940319000  | 3.448041000  | -2.958354000 |
| 6  | 3.635284000  | 6.885732000  | -1.313462000 |
| 1  | 1.784865000  | 6.591333000  | -0.244341000 |
| 6  | 4.543440000  | 6.365614000  | -2.232311000 |
| 1  | 5.000162000  | 4.714590000  | -3.550124000 |
| 1  | 3.822304000  | 7.860699000  | -0.855804000 |
| 1  | 5.439944000  | 6.931285000  | -2.498333000 |
| 6  | -1.900590000 | 0.500883000  | 0.152681000  |
| 7  | -1.699024000 | -0.239841000 | 1.285303000  |

|    |              |              |              |
|----|--------------|--------------|--------------|
| 7  | -3.029255000 | -0.031629000 | -0.415495000 |
| 6  | -2.672852000 | -1.234553000 | 1.407661000  |
| 6  | -3.520086000 | -1.089747000 | 0.357594000  |
| 35 | -2.727999000 | -2.637382000 | 2.598363000  |
| 35 | -4.984451000 | -2.157155000 | 0.041223000  |
| 6  | -0.640422000 | -0.047385000 | 2.263354000  |
| 35 | -1.388438000 | 0.107572000  | 4.037977000  |
| 35 | 0.603767000  | -1.560243000 | 2.175269000  |
| 35 | 0.409289000  | 1.551088000  | 2.005866000  |
| 6  | -3.652951000 | 0.394927000  | -1.656528000 |
| 35 | -5.469566000 | 1.011935000  | -1.302301000 |
| 35 | -2.724341000 | 1.851432000  | -2.526555000 |
| 35 | -3.710636000 | -1.064373000 | -2.941715000 |
| 29 | 1.344463000  | 1.121075000  | -1.164342000 |
| 6  | 2.190958000  | -0.579020000 | -0.850421000 |
| 7  | 1.708542000  | -1.824486000 | -1.130768000 |
| 7  | 3.254219000  | -0.798144000 | -0.024848000 |
| 6  | 4.167042000  | 0.224423000  | 0.457984000  |
| 35 | 3.823213000  | 1.968850000  | -0.325262000 |
| 35 | 5.982755000  | -0.243880000 | -0.051703000 |
| 35 | 4.015129000  | 0.396263000  | 2.382506000  |
| 6  | 3.372622000  | -2.155024000 | 0.285103000  |
| 35 | 4.510743000  | -2.948730000 | 1.490712000  |
| 6  | 2.398273000  | -2.800284000 | -0.406700000 |
| 35 | 2.000662000  | -4.589102000 | -0.249563000 |
| 6  | 0.623369000  | -2.110543000 | -2.043787000 |
| 35 | 1.192941000  | -3.413201000 | -3.363415000 |
| 35 | -0.912162000 | -2.774146000 | -1.041159000 |
| 35 | 0.035258000  | -0.556823000 | -3.037178000 |

TS1'Bi\_NHC-Br

|    |              |              |              |
|----|--------------|--------------|--------------|
| 29 | -0.463088000 | -2.009953000 | 0.566795000  |
| 6  | -3.425308000 | -2.021839000 | 0.264466000  |
| 6  | -2.226925000 | -1.716263000 | -0.031632000 |
| 7  | -3.421100000 | -3.478687000 | 1.620596000  |
| 7  | -1.138162000 | -3.431657000 | 1.832989000  |
| 7  | -2.254566000 | -3.761067000 | 1.941346000  |
| 6  | -4.829531000 | -1.730345000 | 0.121904000  |
| 6  | -5.644955000 | -1.495909000 | 1.241566000  |
| 6  | -5.384446000 | -1.632279000 | -1.165206000 |
| 6  | -6.989446000 | -1.188818000 | 1.073713000  |
| 1  | -5.204729000 | -1.560862000 | 2.242092000  |
| 6  | -6.729947000 | -1.325607000 | -1.322007000 |
| 1  | -4.745696000 | -1.827179000 | -2.032423000 |
| 6  | -7.536769000 | -1.110891000 | -0.206005000 |
| 1  | -7.617551000 | -1.005052000 | 1.949595000  |
| 1  | -7.156965000 | -1.262317000 | -2.326467000 |
| 1  | -8.596502000 | -0.875290000 | -0.333660000 |
| 6  | 1.389507000  | -1.524782000 | 0.879624000  |

|    |              |              |              |
|----|--------------|--------------|--------------|
| 7  | 1.893821000  | -0.524127000 | 1.664993000  |
| 7  | 2.492330000  | -2.116030000 | 0.326481000  |
| 6  | 3.290922000  | -0.487413000 | 1.589675000  |
| 6  | 3.666247000  | -1.498644000 | 0.768209000  |
| 35 | 4.445021000  | 0.761192000  | 2.295655000  |
| 35 | 5.406738000  | -1.889854000 | 0.319956000  |
| 6  | 1.128371000  | 0.394414000  | 2.490049000  |
| 35 | 1.752526000  | 0.301295000  | 4.327285000  |
| 35 | 1.326040000  | 2.208238000  | 1.780034000  |
| 35 | -0.763550000 | 0.035139000  | 2.550674000  |
| 6  | 2.492104000  | -3.279860000 | -0.542537000 |
| 35 | 3.377480000  | -4.749954000 | 0.363742000  |
| 35 | 0.711282000  | -3.885582000 | -1.007141000 |
| 35 | 3.378713000  | -2.879575000 | -2.226470000 |
| 29 | -1.480638000 | -0.083757000 | -0.726449000 |
| 6  | -0.823527000 | 1.688356000  | -1.016196000 |
| 7  | 0.356495000  | 2.049184000  | -1.604194000 |
| 7  | -1.300249000 | 2.842925000  | -0.463439000 |
| 6  | -2.594738000 | 3.005976000  | 0.180651000  |
| 35 | -3.682233000 | 1.404947000  | 0.146173000  |
| 35 | -3.601733000 | 4.375919000  | -0.765094000 |
| 35 | -2.353127000 | 3.494123000  | 2.045032000  |
| 6  | -0.391004000 | 3.890204000  | -0.637278000 |
| 35 | -0.477139000 | 5.600559000  | 0.033416000  |
| 6  | 0.651817000  | 3.390706000  | -1.348352000 |
| 35 | 2.195519000  | 4.310347000  | -1.743243000 |
| 6  | 1.201432000  | 1.177505000  | -2.390471000 |
| 35 | 1.510812000  | 1.956638000  | -4.140516000 |
| 35 | 2.888864000  | 0.889653000  | -1.455179000 |
| 35 | 0.426967000  | -0.569116000 | -2.704402000 |
| 6  | -5.098851000 | -4.725616000 | 0.341617000  |
| 6  | -4.271378000 | -4.963342000 | -0.758590000 |
| 6  | -6.481825000 | -4.699282000 | 0.164263000  |
| 6  | -4.821890000 | -5.165024000 | -2.019011000 |
| 1  | -3.183025000 | -4.965965000 | -0.626564000 |
| 6  | -7.034432000 | -4.908743000 | -1.095661000 |
| 1  | -7.131242000 | -4.490261000 | 1.021980000  |
| 6  | -6.205084000 | -5.135557000 | -2.190290000 |
| 1  | -4.168963000 | -5.349484000 | -2.876425000 |
| 1  | -8.119737000 | -4.882498000 | -1.224883000 |
| 1  | -6.637109000 | -5.293327000 | -3.182029000 |
| 6  | -4.505359000 | -4.457415000 | 1.700240000  |
| 1  | -4.110531000 | -5.379506000 | 2.157215000  |
| 1  | -5.286074000 | -4.070535000 | 2.376439000  |

AC<sub>Mo</sub>\_NHC-I

|    |             |             |              |
|----|-------------|-------------|--------------|
| 6  | 3.440025000 | 0.609860000 | -0.012265000 |
| 6  | 4.551686000 | 0.752974000 | -0.525059000 |
| 29 | 1.761080000 | 0.356064000 | 0.728500000  |

|    |              |              |              |
|----|--------------|--------------|--------------|
| 6  | 5.830216000  | 0.915294000  | -1.117098000 |
| 6  | 7.002892000  | 0.548550000  | -0.427383000 |
| 6  | 5.963996000  | 1.445646000  | -2.415770000 |
| 6  | 8.250961000  | 0.706400000  | -1.013920000 |
| 6  | 7.215968000  | 1.598969000  | -2.995127000 |
| 6  | 8.366399000  | 1.231303000  | -2.299770000 |
| 1  | 6.910285000  | 0.136016000  | 0.580659000  |
| 1  | 5.060201000  | 1.733735000  | -2.959008000 |
| 1  | 9.148345000  | 0.415099000  | -0.460354000 |
| 1  | 7.296900000  | 2.012180000  | -4.004742000 |
| 1  | 9.351005000  | 1.353661000  | -2.758860000 |
| 53 | -0.037458000 | 3.307815000  | -1.289811000 |
| 6  | -0.802479000 | 2.333539000  | 0.508015000  |
| 53 | -2.596123000 | 3.316906000  | 1.282268000  |
| 53 | 0.682917000  | 2.618479000  | 2.135193000  |
| 7  | -1.020904000 | 0.934463000  | 0.242923000  |
| 6  | -0.104169000 | 0.003666000  | 0.618299000  |
| 7  | -0.620653000 | -1.197586000 | 0.245463000  |
| 6  | 0.091725000  | -2.421895000 | 0.511378000  |
| 53 | 1.564191000  | -2.149859000 | 2.149948000  |
| 53 | -1.223741000 | -3.992633000 | 1.275453000  |
| 53 | 1.170369000  | -3.039720000 | -1.281770000 |
| 53 | -2.767604000 | -2.395929000 | -1.699010000 |
| 6  | -1.763574000 | -1.004436000 | -0.540723000 |
| 6  | -2.016280000 | 0.338387000  | -0.541535000 |
| 53 | -3.462577000 | 1.269201000  | -1.693728000 |

TS1<sub>Mo</sub>\_NHC-I

|    |              |              |              |
|----|--------------|--------------|--------------|
| 7  | 2.457693000  | -0.203175000 | 2.081530000  |
| 7  | 3.671695000  | -0.292048000 | 2.469153000  |
| 7  | 4.749152000  | -0.097419000 | 2.035270000  |
| 6  | 3.767808000  | 0.472123000  | -0.241330000 |
| 6  | 4.966381000  | 0.409082000  | 0.166303000  |
| 29 | 1.949236000  | 0.276391000  | 0.200563000  |
| 6  | 1.466233000  | -0.803029000 | 2.954042000  |
| 1  | 1.141865000  | -1.777541000 | 2.531927000  |
| 1  | 1.919693000  | -1.031819000 | 3.935098000  |
| 6  | 0.261678000  | 0.082441000  | 3.120574000  |
| 6  | -1.025537000 | -0.458759000 | 3.145179000  |
| 6  | 0.415592000  | 1.466068000  | 3.251161000  |
| 6  | -2.141520000 | 0.362803000  | 3.288885000  |
| 6  | -0.695905000 | 2.287160000  | 3.393026000  |
| 6  | -1.980017000 | 1.739756000  | 3.402766000  |
| 1  | -1.158157000 | -1.542187000 | 3.025661000  |
| 1  | 1.422767000  | 1.894754000  | 3.224832000  |
| 1  | -3.145652000 | -0.077022000 | 3.282986000  |
| 1  | -0.562642000 | 3.369091000  | 3.488181000  |
| 1  | -2.854911000 | 2.391213000  | 3.494472000  |
| 6  | 6.383667000  | 0.480043000  | -0.076199000 |

|    |              |              |              |
|----|--------------|--------------|--------------|
| 6  | 7.347828000  | 0.541141000  | 0.941506000  |
| 6  | 6.819591000  | 0.503028000  | -1.415355000 |
| 6  | 8.699220000  | 0.620249000  | 0.623519000  |
| 6  | 8.169810000  | 0.581622000  | -1.721910000 |
| 6  | 9.119374000  | 0.639361000  | -0.703013000 |
| 1  | 7.028666000  | 0.528939000  | 1.984001000  |
| 1  | 6.069821000  | 0.456114000  | -2.210273000 |
| 1  | 9.436855000  | 0.668828000  | 1.429634000  |
| 1  | 8.486032000  | 0.596142000  | -2.768732000 |
| 1  | 10.184022000 | 0.699972000  | -0.943994000 |
| 53 | -0.958223000 | 2.350157000  | -2.620482000 |
| 6  | -0.630089000 | 2.369566000  | -0.425556000 |
| 53 | -1.805015000 | 4.034412000  | 0.425615000  |
| 53 | 1.403733000  | 3.040340000  | -0.022315000 |
| 7  | -0.910073000 | 1.025718000  | 0.040524000  |
| 6  | 0.066517000  | 0.039938000  | 0.005068000  |
| 7  | -0.623125000 | -1.155156000 | 0.032109000  |
| 6  | -0.077825000 | -2.442397000 | -0.333722000 |
| 53 | 2.064077000  | -2.512629000 | -0.672935000 |
| 53 | -0.416828000 | -4.016394000 | 1.189814000  |
| 53 | -0.988270000 | -3.064199000 | -2.264541000 |
| 53 | -3.546348000 | -2.258993000 | 0.434606000  |
| 6  | -2.006267000 | -0.910363000 | 0.082945000  |
| 6  | -2.181629000 | 0.434885000  | 0.042389000  |
| 53 | -4.062241000 | 1.302295000  | -0.052817000 |

TS1'<sub>Mo</sub>\_NHC-I

|    |              |              |              |
|----|--------------|--------------|--------------|
| 7  | -1.082417000 | -0.375445000 | -0.959871000 |
| 7  | -2.013100000 | -0.626509000 | -1.648839000 |
| 7  | -3.148577000 | -1.164915000 | -1.551261000 |
| 6  | -2.749349000 | -1.189027000 | 1.095400000  |
| 6  | -3.682121000 | -1.518521000 | 0.289136000  |
| 29 | -1.027526000 | -0.555669000 | 1.063669000  |
| 6  | -5.035723000 | -2.009180000 | 0.156353000  |
| 6  | -6.061366000 | -1.418818000 | 0.913028000  |
| 6  | -5.364133000 | -3.040336000 | -0.735794000 |
| 6  | -7.377194000 | -1.834078000 | 0.760078000  |
| 6  | -6.683957000 | -3.449315000 | -0.887539000 |
| 6  | -7.696882000 | -2.843174000 | -0.146963000 |
| 1  | -5.802689000 | -0.608483000 | 1.601339000  |
| 1  | -4.561534000 | -3.509661000 | -1.313895000 |
| 1  | -8.166429000 | -1.355669000 | 1.347105000  |
| 1  | -6.925180000 | -4.254449000 | -1.587778000 |
| 1  | -8.735031000 | -3.162863000 | -0.271603000 |
| 53 | 1.816122000  | 3.990997000  | 1.360231000  |
| 6  | 0.381284000  | 2.427108000  | 0.785787000  |
| 53 | -1.038558000 | 3.171302000  | -0.705592000 |
| 53 | -0.765323000 | 2.028825000  | 2.616435000  |
| 7  | 1.063896000  | 1.257089000  | 0.316261000  |



|    |              |              |              |
|----|--------------|--------------|--------------|
| 6  | 0.825099000  | 0.023951000  | 0.844845000  |
| 7  | 1.662907000  | -0.825141000 | 0.189102000  |
| 6  | 1.733396000  | -2.221099000 | 0.525190000  |
| 53 | 0.768383000  | -2.652239000 | 2.456852000  |
| 53 | 0.739786000  | -3.438513000 | -0.989319000 |
| 53 | 3.819312000  | -2.852458000 | 0.825101000  |
| 53 | 3.451236000  | -0.965358000 | -2.382053000 |
| 6  | 2.303854000  | -0.158208000 | -0.859262000 |
| 6  | 1.935448000  | 1.153907000  | -0.773120000 |
| 53 | 2.538773000  | 2.639356000  | -2.083429000 |
| 6  | -4.170972000 | -0.777041000 | -2.518042000 |
| 1  | -3.668958000 | -0.316306000 | -3.384559000 |
| 1  | -4.681654000 | -1.679131000 | -2.891452000 |
| 6  | -5.188397000 | 0.162813000  | -1.921951000 |
| 6  | -4.797658000 | 1.159026000  | -1.022129000 |
| 6  | -6.540530000 | 0.011381000  | -2.228336000 |
| 6  | -5.750717000 | 1.988578000  | -0.441642000 |
| 6  | -7.493527000 | 0.845431000  | -1.652059000 |
| 6  | -7.100524000 | 1.833431000  | -0.753565000 |
| 1  | -3.741653000 | 1.252358000  | -0.737013000 |
| 1  | -6.851079000 | -0.795066000 | -2.902946000 |
| 1  | -5.437714000 | 2.756072000  | 0.271928000  |
| 1  | -8.552120000 | 0.709046000  | -1.890158000 |
| 1  | -7.848681000 | 2.480692000  | -0.287648000 |

#### AC<sub>Bi</sub>\_NHC-I

|    |              |              |              |
|----|--------------|--------------|--------------|
| 6  | -0.029024000 | -3.322590000 | -0.521102000 |
| 6  | 0.736962000  | -4.278227000 | -0.327238000 |
| 29 | 1.180989000  | -1.880805000 | 0.165362000  |
| 6  | 1.730303000  | -5.273789000 | -0.144887000 |
| 6  | 2.021117000  | -5.782508000 | 1.134217000  |
| 6  | 2.521172000  | -5.684427000 | -1.240009000 |
| 6  | 3.075022000  | -6.667145000 | 1.311811000  |
| 6  | 3.577067000  | -6.568515000 | -1.048883000 |
| 6  | 3.856644000  | -7.058534000 | 0.225063000  |
| 1  | 1.409596000  | -5.465425000 | 1.983582000  |
| 1  | 2.282084000  | -5.303774000 | -2.238103000 |
| 1  | 3.294404000  | -7.055895000 | 2.309479000  |
| 1  | 4.182757000  | -6.883211000 | -1.902780000 |
| 1  | 4.686998000  | -7.753844000 | 0.372267000  |
| 6  | 4.189723000  | -0.493060000 | -0.691784000 |
| 7  | 3.265093000  | 0.207666000  | 0.177457000  |
| 6  | 2.196154000  | -0.381334000 | 0.785973000  |
| 7  | 1.747101000  | 0.531698000  | 1.695606000  |
| 6  | 0.740142000  | 0.240655000  | 2.688585000  |
| 6  | 2.431918000  | 1.744135000  | 1.548874000  |
| 6  | 3.392834000  | 1.536850000  | 0.601532000  |
| 29 | -1.245869000 | -1.966322000 | -0.977024000 |
| 6  | -2.369650000 | -0.421356000 | -1.102528000 |

|    |              |              |              |
|----|--------------|--------------|--------------|
| 7  | -3.530047000 | -0.306497000 | -0.406088000 |
| 6  | -4.299637000 | -1.461557000 | 0.008132000  |
| 6  | -3.834756000 | 1.041196000  | -0.190457000 |
| 6  | -2.912116000 | 1.766960000  | -0.890111000 |
| 7  | -2.041838000 | 0.841559000  | -1.485060000 |
| 6  | -0.980691000 | 1.138712000  | -2.417476000 |
| 53 | 0.648810000  | 2.220937000  | -1.440532000 |
| 53 | -0.084464000 | -0.668317000 | -3.300645000 |
| 53 | -1.773610000 | 2.248102000  | -4.128659000 |
| 53 | -3.751060000 | -3.253795000 | -1.169421000 |
| 53 | -6.424157000 | -1.208768000 | -0.431328000 |
| 53 | -3.942427000 | -1.901616000 | 2.107854000  |
| 53 | -5.109868000 | 1.821293000  | 1.242423000  |
| 53 | -2.764194000 | 3.829532000  | -0.851345000 |
| 53 | 0.314131000  | -1.913039000 | 2.892897000  |
| 53 | -1.158409000 | 1.212310000  | 2.175176000  |
| 53 | 1.418333000  | 0.811024000  | 4.690853000  |
| 53 | 1.911757000  | 3.602012000  | 2.307009000  |
| 53 | 4.588278000  | 3.028728000  | -0.195848000 |
| 53 | 4.089999000  | 0.238341000  | -2.747977000 |
| 53 | 6.222856000  | -0.340688000 | 0.118773000  |
| 53 | 3.808068000  | -2.657092000 | -0.802022000 |

TS1<sub>Bi</sub>\_NHC-I

|    |              |             |              |
|----|--------------|-------------|--------------|
| 29 | -1.078239000 | 2.105074000 | -0.370115000 |
| 6  | 0.691023000  | 4.250943000 | -1.432558000 |
| 6  | 0.324935000  | 3.055993000 | -1.215041000 |
| 7  | -0.644071000 | 5.459332000 | -0.607905000 |
| 7  | -2.021861000 | 3.796162000 | 0.186450000  |
| 7  | -1.555934000 | 4.936419000 | -0.099018000 |
| 6  | -3.506252000 | 3.462577000 | 2.179693000  |
| 6  | -2.744830000 | 4.176243000 | 3.110745000  |
| 6  | -4.509010000 | 2.603590000 | 2.637746000  |
| 6  | -3.017155000 | 4.070349000 | 4.469605000  |
| 1  | -1.948968000 | 4.842234000 | 2.757671000  |
| 6  | -4.794063000 | 2.509706000 | 3.997964000  |
| 1  | -5.102337000 | 2.035898000 | 1.909761000  |
| 6  | -4.056616000 | 3.252726000 | 4.914785000  |
| 1  | -2.428354000 | 4.646037000 | 5.188996000  |
| 1  | -5.599649000 | 1.855050000 | 4.341766000  |
| 1  | -4.288757000 | 3.195626000 | 5.981991000  |
| 6  | -3.380043000 | 3.729001000 | 0.702697000  |
| 1  | -3.912797000 | 4.663369000 | 0.452498000  |
| 1  | -3.902517000 | 2.927930000 | 0.151096000  |
| 6  | 1.702212000  | 5.124612000 | -1.955757000 |
| 6  | 2.480611000  | 4.647859000 | -3.034784000 |
| 6  | 2.017379000  | 6.371916000 | -1.396103000 |
| 6  | 3.559465000  | 5.386416000 | -3.510378000 |
| 1  | 2.203016000  | 3.696942000 | -3.503896000 |

|    |              |              |              |
|----|--------------|--------------|--------------|
| 6  | 3.092059000  | 7.103497000  | -1.885407000 |
| 1  | 1.416805000  | 6.754885000  | -0.569434000 |
| 6  | 3.870208000  | 6.615315000  | -2.933993000 |
| 1  | 4.149520000  | 5.005529000  | -4.348428000 |
| 1  | 3.330449000  | 8.071806000  | -1.437418000 |
| 1  | 4.714215000  | 7.199399000  | -3.309262000 |
| 6  | -2.095758000 | 0.601283000  | 0.266271000  |
| 7  | -1.851383000 | -0.109475000 | 1.412644000  |
| 7  | -3.184008000 | -0.008591000 | -0.315654000 |
| 6  | -2.751460000 | -1.177562000 | 1.527148000  |
| 6  | -3.601147000 | -1.099442000 | 0.464639000  |
| 53 | -2.702877000 | -2.784490000 | 2.839427000  |
| 53 | -5.151059000 | -2.441078000 | 0.149217000  |
| 6  | -0.847591000 | 0.196496000  | 2.418343000  |
| 53 | -1.784467000 | 0.424941000  | 4.381081000  |
| 53 | 0.746967000  | -1.340562000 | 2.435383000  |
| 53 | 0.251689000  | 2.065345000  | 2.177151000  |
| 6  | -3.857926000 | 0.403388000  | -1.535397000 |
| 53 | -5.920797000 | 1.036499000  | -1.074768000 |
| 53 | -2.963103000 | 2.091184000  | -2.596490000 |
| 53 | -3.915528000 | -1.174125000 | -3.077409000 |
| 29 | 1.257665000  | 1.332341000  | -1.163869000 |
| 6  | 2.309112000  | -0.275848000 | -0.846487000 |
| 7  | 1.938660000  | -1.569487000 | -1.071965000 |
| 7  | 3.420037000  | -0.353023000 | -0.057578000 |
| 6  | 4.302559000  | 0.764271000  | 0.208150000  |
| 53 | 3.786944000  | 2.543476000  | -0.984564000 |
| 53 | 6.344048000  | 0.272781000  | -0.439114000 |
| 53 | 4.263120000  | 1.348260000  | 2.308481000  |
| 6  | 3.650900000  | -1.677581000 | 0.332133000  |
| 53 | 4.929137000  | -2.372235000 | 1.804894000  |
| 6  | 2.724517000  | -2.444845000 | -0.310164000 |
| 53 | 2.445430000  | -4.469069000 | 0.026209000  |
| 6  | 0.936224000  | -1.966171000 | -2.028334000 |
| 53 | 1.777272000  | -3.366078000 | -3.487245000 |
| 53 | -0.818733000 | -2.817446000 | -1.026479000 |
| 53 | 0.192330000  | -0.295657000 | -3.249579000 |

TS1'Bi\_NHC-I

|    |              |             |              |
|----|--------------|-------------|--------------|
| 29 | -0.892891000 | 1.824971000 | 1.002774000  |
| 6  | 1.179475000  | 3.990388000 | 0.821736000  |
| 6  | 0.632390000  | 2.863286000 | 0.588885000  |
| 7  | 0.112697000  | 5.054834000 | 2.085250000  |
| 7  | -1.432403000 | 3.372820000 | 2.317123000  |
| 7  | -0.914236000 | 4.414241000 | 2.395274000  |
| 6  | 2.306026000  | 4.843104000 | 0.551190000  |
| 6  | 2.709840000  | 5.017429000 | -0.787007000 |
| 6  | 3.049017000  | 5.452192000 | 1.573191000  |
| 6  | 3.828662000  | 5.789346000 | -1.087245000 |

|    |              |              |              |
|----|--------------|--------------|--------------|
| 1  | 2.108968000  | 4.557787000  | -1.581002000 |
| 6  | 4.160453000  | 6.225381000  | 1.263082000  |
| 1  | 2.745837000  | 5.297022000  | 2.613350000  |
| 6  | 4.551654000  | 6.399830000  | -0.064560000 |
| 1  | 4.128336000  | 5.927289000  | -2.129846000 |
| 1  | 4.737554000  | 6.691309000  | 2.066484000  |
| 1  | 5.426699000  | 7.010429000  | -0.301327000 |
| 6  | -2.156254000 | 0.355114000  | 0.987472000  |
| 7  | -2.001457000 | -0.843754000 | 1.633786000  |
| 7  | -3.301743000 | 0.215274000  | 0.244769000  |
| 6  | -2.998337000 | -1.746488000 | 1.243278000  |
| 6  | -3.840641000 | -1.070124000 | 0.412817000  |
| 53 | -3.051638000 | -3.808315000 | 1.494806000  |
| 53 | -5.574059000 | -1.901012000 | -0.365440000 |
| 6  | -0.992622000 | -1.145053000 | 2.631554000  |
| 53 | -1.918513000 | -1.984700000 | 4.443171000  |
| 53 | 0.542743000  | -2.490146000 | 1.799546000  |
| 53 | 0.095488000  | 0.573093000  | 3.411272000  |
| 6  | -3.953428000 | 1.259593000  | -0.524386000 |
| 53 | -5.825231000 | 1.811276000  | 0.476975000  |
| 53 | -2.827586000 | 3.122725000  | -0.720765000 |
| 53 | -4.310861000 | 0.684802000  | -2.621014000 |
| 29 | 1.331492000  | 1.326033000  | -0.348860000 |
| 6  | 2.123432000  | -0.328751000 | -0.952621000 |
| 7  | 1.541167000  | -1.342699000 | -1.652794000 |
| 7  | 3.239179000  | -0.869275000 | -0.391650000 |
| 6  | 4.265255000  | -0.067070000 | 0.242684000  |
| 53 | 4.075774000  | 2.075405000  | -0.282506000 |
| 53 | 6.252028000  | -0.606343000 | -0.499548000 |
| 53 | 4.129956000  | -0.231656000 | 2.408987000  |
| 6  | 3.256284000  | -2.254530000 | -0.580947000 |
| 53 | 4.361718000  | -3.652429000 | 0.473158000  |
| 6  | 2.203388000  | -2.552238000 | -1.397182000 |
| 53 | 1.651584000  | -4.469312000 | -1.946405000 |
| 6  | 0.446560000  | -1.150776000 | -2.568175000 |
| 53 | 1.001486000  | -1.830433000 | -4.571612000 |
| 53 | -1.360171000 | -2.153444000 | -1.849324000 |
| 53 | -0.098074000 | 0.966981000  | -2.815767000 |
| 6  | 0.075075000  | 6.514809000  | 1.974644000  |
| 1  | 0.908390000  | 6.935579000  | 2.559927000  |
| 1  | -0.857015000 | 6.874651000  | 2.439731000  |
| 6  | 0.184937000  | 6.962179000  | 0.539582000  |
| 6  | 1.095745000  | 7.952890000  | 0.174659000  |
| 6  | -0.588335000 | 6.351184000  | -0.449349000 |
| 6  | 1.236018000  | 8.323444000  | -1.159670000 |
| 6  | -0.446245000 | 6.712159000  | -1.783652000 |
| 6  | 0.472303000  | 7.698412000  | -2.141422000 |
| 1  | 1.719583000  | 8.420783000  | 0.944739000  |
| 1  | -1.297829000 | 5.566863000  | -0.153854000 |
| 1  | 1.956686000  | 9.097774000  | -1.435890000 |

|   |              |             |              |
|---|--------------|-------------|--------------|
| 1 | -1.056530000 | 6.229362000 | -2.552349000 |
| 1 | 0.587466000  | 7.983573000 | -3.190402000 |
